# Supplementary material for: Using carbon dioxide and calix[4]arenes to separate sodium
Source: Royal Society of Chemistry journal article supplement (doi:10.1039/b708420j), 2007-01-01

## SUPPORTING INFORMATION

# Using carbon dioxide and calix[4]arenes to separate sodium

Hexiang Zhang and Dmitry M. Rudkevich\*

*Department of Chemistry & Biochemistry, The University of Texas at  
Arlington, Arlington, TX 76019-0065*

E-mail: rudkevich@uta.edu

**General.** Melting points were determined on a Mel-Temp apparatus (Laboratory Devices, Inc.) and are uncorrected.  $^1\text{H}$ ,  $^{13}\text{C}$  NMR, COSY NMR spectra were recorded at  $295 \pm 1$  K on JEOL 300 and 500 MHz spectrometers. Chemical shifts were measured relative to residual non-deuterated solvent resonances. FTIR spectra were recorded on a Bruker Vector 22 FTIR spectrometer. ESI-TOF high-resolution mass spectra were recorded on an Agilent ESI-TOF mass spectrometer at the Scripps Center for Mass Spectrometry (La Jolla, CA). Elemental analysis was performed on a Perkin-Elmer 2400 CHN analyzer. All experiments with moisture- and/or air-sensitive compounds were performed under a dried nitrogen atmosphere. All reagents were purchased from Sigma-Aldrich (St. Louis, MO) and AK Scientific (Mountain View, CA) used as received. Calixarenes **5**<sup>1</sup> and **6**<sup>2</sup> were prepared by known protocols.

S2

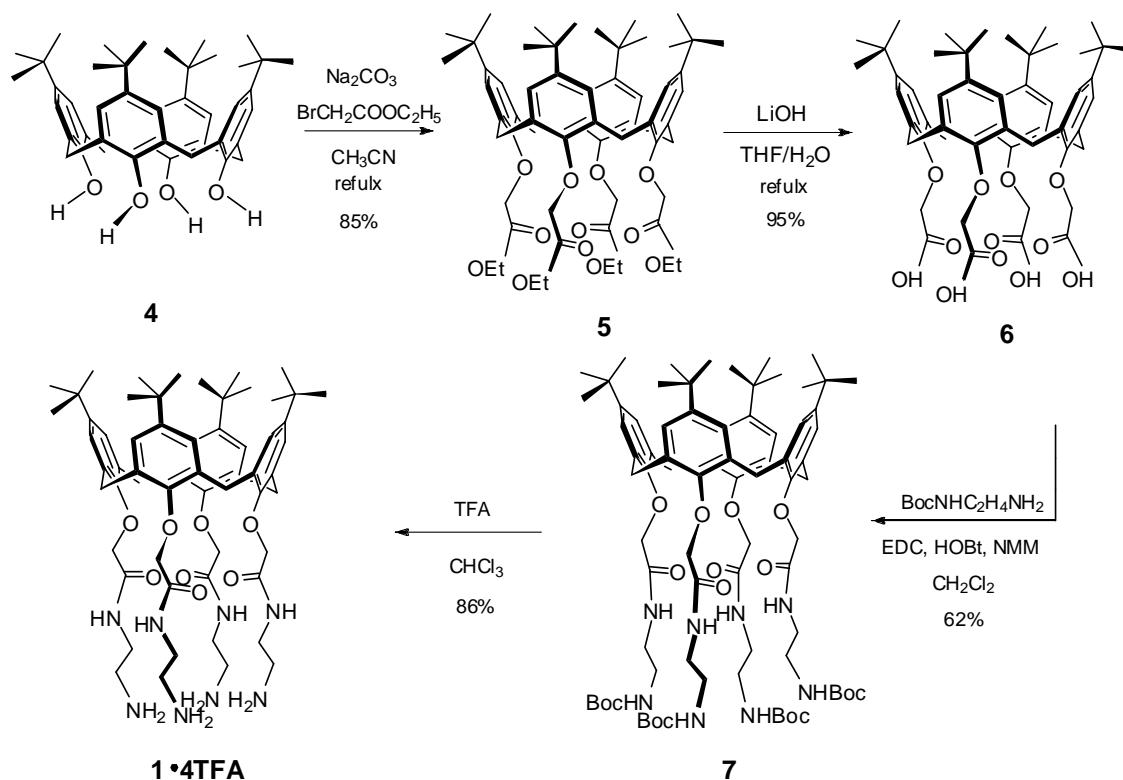

Scheme 1. Preparation of *t*-Bu calix[4]arene derivatives.

**5,11,17,23-Tetra-*tert*-butyl-25,26,27,28-tetra-[BocHNC<sub>2</sub>H<sub>4</sub>NHC(O)CH<sub>2</sub>O]-calix[4]-arene (7):** *N*-Boc-ethylenediamine (0.24 mL, 1.5 mmol) and *t*-Bu-calix[4]arene tetraacid **6** (220 mg, 0.25 mmol) were mixed with EDC•HCl (191 mg, 1.0 mmol), HOBT (135 mg, 1.0 mmol) and NMM (0.1 mL) in dry  $\text{CH}_2\text{Cl}_2$  (25 mL) and stirred at 0 °C overnight. The solution was evaporated to dryness. The solid was dissolved in  $\text{CH}_2\text{Cl}_2$  (50 mL) and washed with 5% aq HCl (50 mL) and water (3 x 50 mL) and evaporated. The residue was recrystallized from MeOH to give tetraamide **7** as a white solid (259 mg, 62 %); m.p. > 240 °C (decomp); IR (KBr,  $\text{cm}^{-1}$ ):  $\nu$  2964, 2880, 1692, 1534, 1480, 1392, 1365, 1251, 1174, 1126, 1043, 871;  $^1\text{H}$  NMR ( $\text{CDCl}_3$ , 500 MHz):  $\delta$  7.98 (br t, 4 H), 6.78 (s, 8 H), 5.49 (br, 4 H), 4.53 (d,  $J$  = 13.1 Hz, 4 H), 4.50 (s, 8 H), 3.50 (d,  $J$  = 5.1 Hz, 8 H), 3.29 (d,  $J$  = 5.1 Hz, 8 H), 3.24 (d,  $J$  = 13.1 Hz, 4 H), 1.43 (s, 36 H), 1.07 (s, 36 H);  $^{13}\text{C}$  NMR ( $\text{CDCl}_3$ , 500 MHz):  $\delta$  170.4, 156.6, 152.8, 146.0, 132.7, 126.0, 79.2, 74.3, 45.0, 40.8, 39.5, 34.0,

31.4, 28.5; ESI-TOF  $m/z$  1449.8880, ( $[M + H^+]$ , calcd for  $C_{80}H_{120}N_8O_{16}$  1449.8895); Calcd for  $C_{80}H_{120}N_8O_{16}$ : C, 66.27; H, 8.34; N, 7.73. Found: C, 66.36; H, 8.17; N, 7.96.

**5,11,17,23-Tetra-*tert*-butyl-25,26,27,28-tetra-[H<sub>2</sub>NC<sub>2</sub>H<sub>4</sub>NHC(O)CH<sub>2</sub>O]-calix[4]arene TFA salt (1 • 4TFA):** Tetraamide **7** (145 mg, 0.1 mmol) and TFA (0.5 mL, 6.5 mmol) were dissolved in dry CH<sub>2</sub>Cl<sub>2</sub> (10 mL) and stirred overnight. The solvent was removed, and Et<sub>2</sub>O (20 mL) was added to precipitate tetraamine **1** as a TFA salt (129 mg, 86 %); m.p. 182-185 °C (decomp); IR (KBr, cm<sup>-1</sup>):  $\nu$  2964, 2083, 1659, 1535, 1461, 1392, 1363, 1300, 1178, 1135, 1052, 872; <sup>1</sup>H NMR (DMSO-*d*<sub>6</sub>, 300 MHz):  $\delta$  8.43 (br t, 4 H), 7.90 (br, 12 H), 6.81 (s, 8 H), 4.50 (d,  $J = 12.9$  Hz, 4 H), 4.47 (s, 8 H), 3.40-3.38 (br q, 8 H), 3.20 (d,  $J = 12.9$  Hz, 4 H), 2.90 (br, 8 H), 1.02 (s, 36 H); <sup>13</sup>C NMR (DMSO-*d*<sub>6</sub>, 300 MHz):  $\delta$  169.6, 159.0 (q,  $J = 29.8$  Hz, CF<sub>3</sub>C=O), 151.3, 146.8, 133.4, 126.1, 117.0 (q,  $J = 295.2$  Hz, CF<sub>3</sub>C=O), 74.4, 42.8, 41.8, 34.1, 31.6; ESI-TOF  $m/z$  1049.6782, ([Free amine + H<sup>+</sup>], calcd for  $C_{60}H_{89}N_8O_8$  1449.6803); Calcd for  $C_{68}H_{92}F_{12}N_8O_{16}$ : C, 54.25; H, 6.16; N, 7.44. Found: C, 54.36; H, 6.17; N, 7.36.

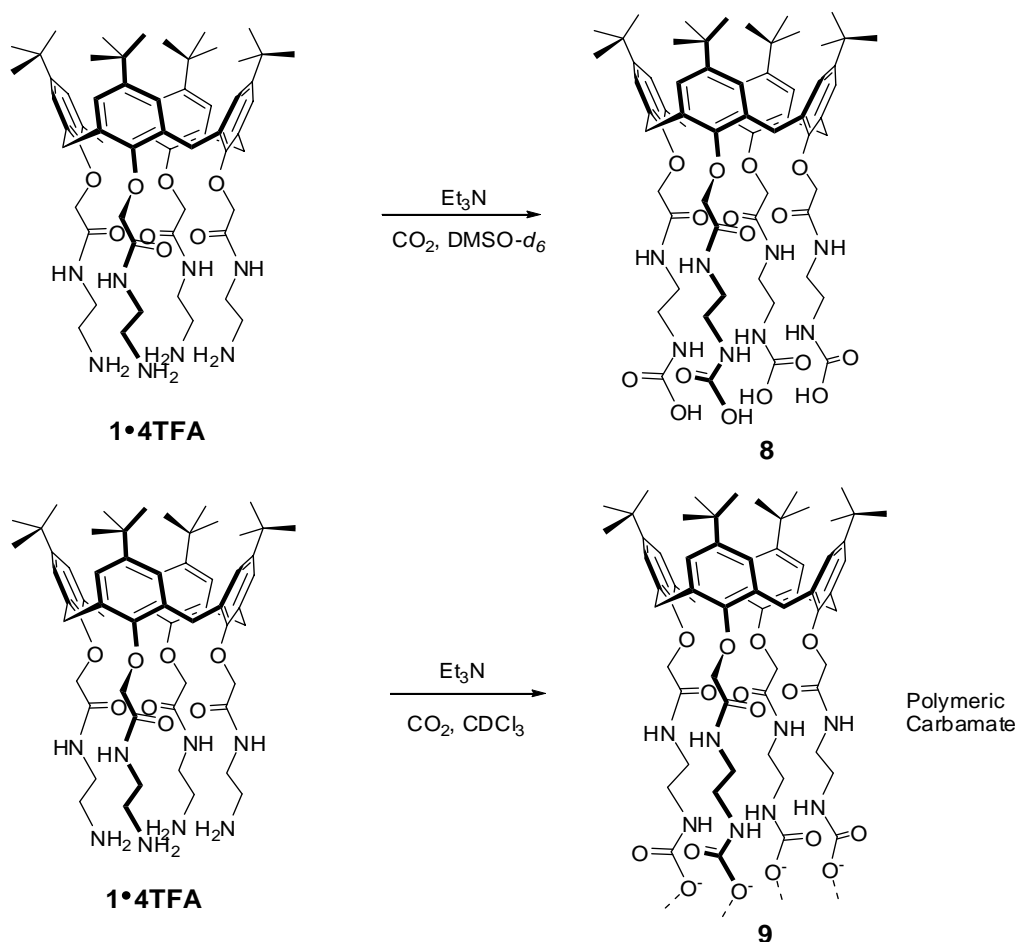

Scheme 2. Reactions of *t*-Bu calix[4]arene tetraamine with  $\text{CO}_2$ .

**5,11,17,23-Tetra-*tert*-butyl-25,26,27,28-tetra- $[\text{H}_2\text{NC}_2\text{H}_4\text{NHC}(\text{O})\text{CH}_2\text{O}]$ -calix[4]arene carbamic acid (8):** Compound **1•4TFA** (15 mg, 0.01 mmol) and TEA (0.02 mL) were dissolved in  $\text{DMSO-}d_6$  (0.5 mL), after which  $\text{CO}_2$  was then introduced to form carbamic acid **8**:  $^1\text{H}$  NMR ( $\text{DMSO-}d_6$ , 300 MHz):  $\delta$  8.33 (br, 4 H), 6.81 (s, 8 H), 6.68 (br, 4 H), 4.52 (d,  $J = 12.0$  Hz, 4 H), 4.46 (s, 8 H), 3.10 (d,  $J = 12.0$  Hz, 4 H), 3.06 (br, 8 H), 1.04 (s, 36 H).

**5,11,17,23-Tetra-*tert*-butyl-25,26,27,28-tetra- $[\text{H}_2\text{NC}_2\text{H}_4\text{NHC}(\text{O})\text{CH}_2\text{O}]$ -calix[4]arene carbamate (9):**  $^1\text{H}$  NMR ( $\text{DMSO-}d_6$ , 500 MHz):  $\delta$  8.50 (br t, 4 H), 6.85 (s + br s, 12 H), 6.80-6.00 (br), 4.55 (s, 8 H), 4.40 (d,  $J = 12.4$  Hz, 4 H), 3.42 (m, 8 H), 3.21 (d,  $J = 12.4$  Hz, 4 H), 2.90-2.85 (m, 24 H), 1.02 (m, 60 H).  $^{13}\text{C}$  NMR ( $\text{DMSO-}d_6$ , 300 MHz):  $\delta$  170.5, 159.7 (q,  $J = 30.5$  Hz,  $\text{CF}_3\text{C}=\text{O}$ ), 153.3, 145.1, 133.5, 125.9, 117.5 (q,  $J = 297.5$  Hz,

CF<sub>3</sub>C=O), 74.4, 46.2, 37.6, 34.1, 31.6, 10.1. Due to the low concentration, the carbamate C=O singlet cannot be detected.<sup>3</sup>

**Extraction of alkali-metal perchlorates (MClO<sub>4</sub>) by calixarene (1); a general procedure:** Compound **1** (15.0 mg, 0.01 mmol) was dissolved in 1 mL CHCl<sub>3</sub> in the presence of TEA (0.02 mL). Alkali-metal perchlorate (0.01 mmol) was added and the suspension was stirred overnight. The solution was separated. CO<sub>2</sub> (or <sup>13</sup>CO<sub>2</sub>) was then introduced and the precipitate was collected and dried. The <sup>13</sup>C NMR spectrum of calixarene-Na<sup>+</sup> carbamate polymer **3** was measured with <sup>13</sup>CO<sub>2</sub> gas.

**5,11,17,23-Tetra-*tert*-butyl-25,26,27,28-tetra-[H<sub>2</sub>NC<sub>2</sub>H<sub>4</sub>NHC(O)CH<sub>2</sub>O]-calix[4]arene NaClO<sub>4</sub> complex (2):** <sup>1</sup>H NMR (DMSO-*d*<sub>6</sub>, 300 MHz): δ 8.43 (br, 4 H), 7.12 (s, 8 H), 4.40 (s, 8 H), 4.34 (d, *J* = 12.0 Hz, 4 H), 3.40-3.37 (m, 8 H), 3.33 (d, *J* = 12.0 Hz, 4 H), 3.03-2.88 (br, 8 H), 1.12 (m, 36 H); <sup>13</sup>C NMR (DMSO-*d*<sub>6</sub>, 300 MHz): δ 170.6, 160.0 (q, *J* = 31.2 Hz, CF<sub>3</sub>C=O), 151.8, 147.0, 134.3, 126.3, 117.6 (q, *J* = 295.2 Hz, CF<sub>3</sub>C=O), 74.8, 46.2, 37.4, 34.4, 31.5, 30.6, 9.4.

**5,11,17,23-Tetra-*tert*-butyl-25,26,27,28-tetra-[H<sub>2</sub>NC<sub>2</sub>H<sub>4</sub>NHC(O)CH<sub>2</sub>O]-calix[4]arene NaClO<sub>4</sub> complex carbamate (3):** Obtained from **2** using <sup>13</sup>C-labeled CO<sub>2</sub>. <sup>13</sup>C NMR (DMSO-*d*<sub>6</sub>, 300 MHz): δ 170.5, 160.4 (<sup>13</sup>C=O), 159.7 (q, *J* = 31.6 Hz, CF<sub>3</sub>C=O), 151.6, 147.0, 134.5, 126.3, 117.7 (q, *J* = 296.8 Hz, CF<sub>3</sub>C=O), 74.9, 46.2, 37.8, 34.5, 31.5, 30.6, 10.1.

## REFERENCES

- 1 M. A. McKerverey, E. M. Seward, G. Ferguson, B. Ruhl, S. J. Harris, *J. Chem. Soc., Chem. Commun.* 1985, **7**, 388.
- 2 A. Arduini, A. Pochini, S. Reverberi, R. Ungaro, *J. Chem. Soc., Chem. Commun.* 1984, 981.
- 3 (a) M. George, R. G. Weiss, *Langmuir* 2002, **18**, 7124. (b) M. George, R. G. Weiss, *Langmuir* 2003, **19**, 8168.

$^1\text{H}$  NMR in  $\text{DMSO}-d_6$  for compound **1**

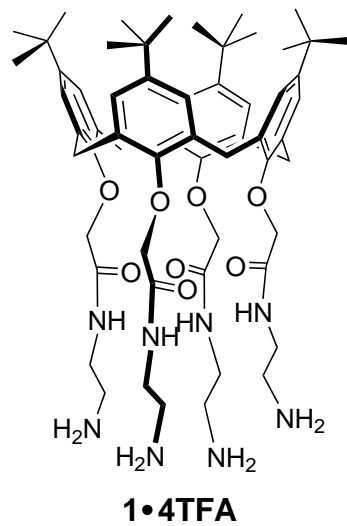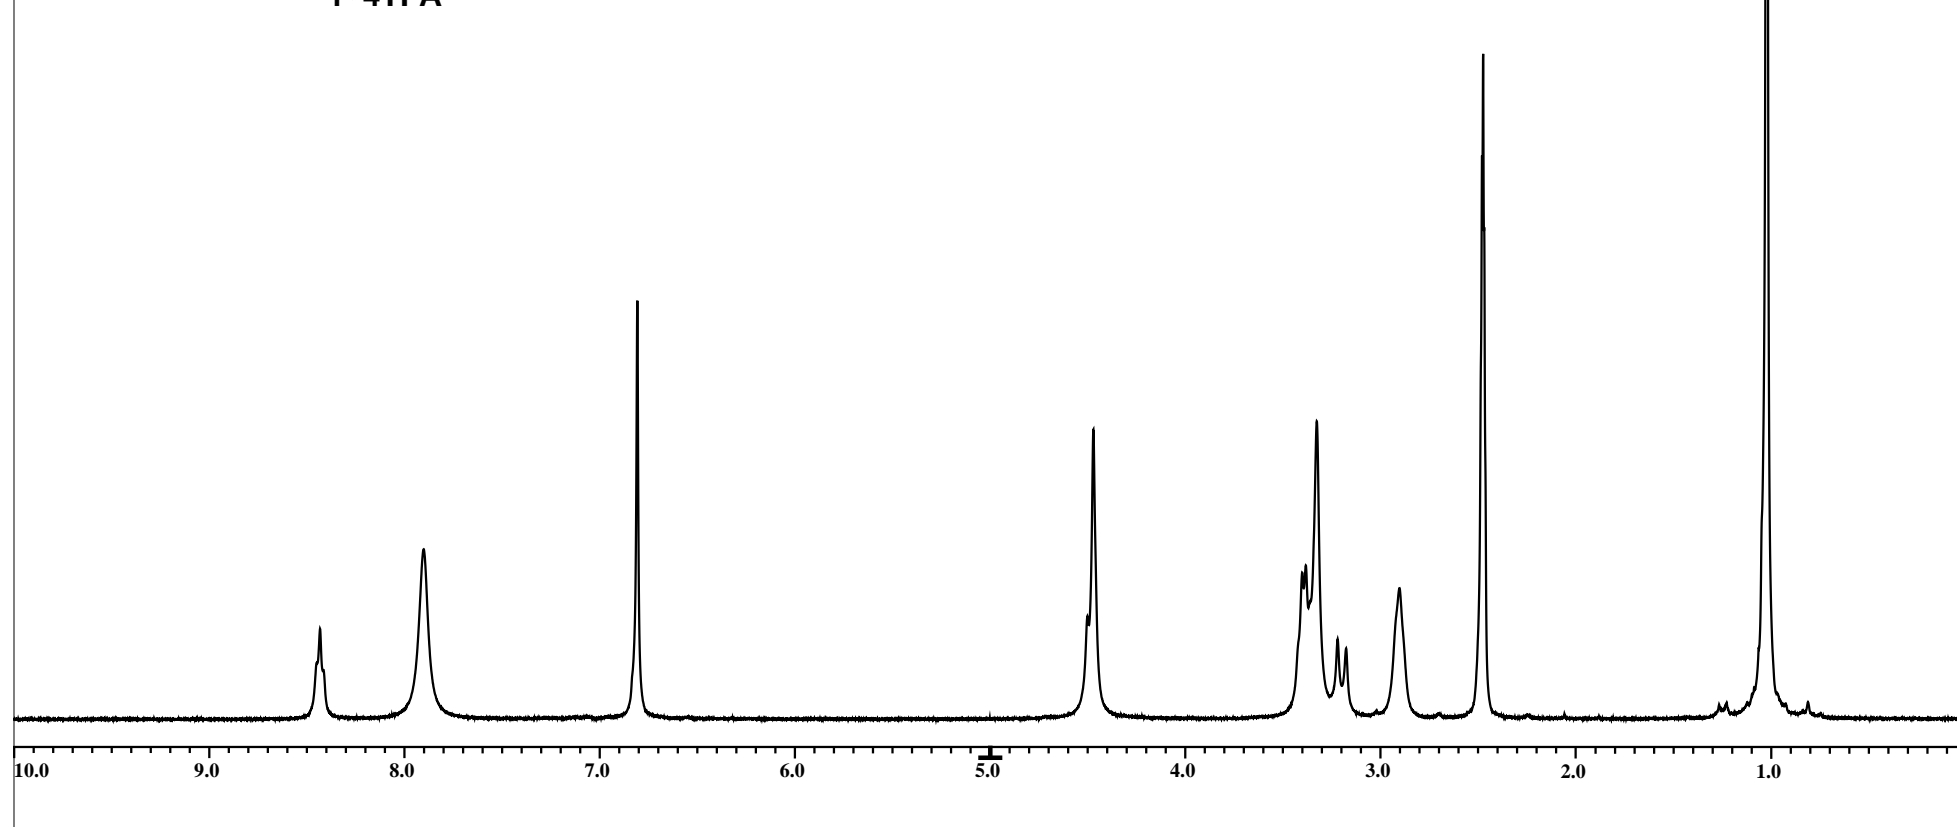

$^{13}\text{C}$  NMR in  $\text{DMSO}-d_6$  for compound **1**

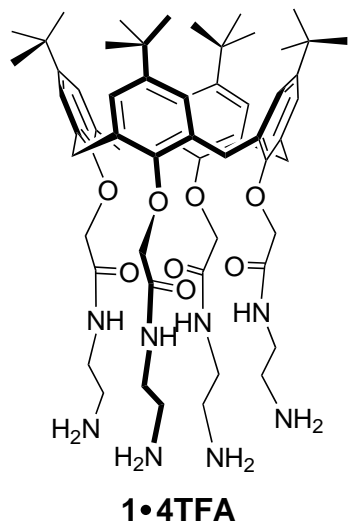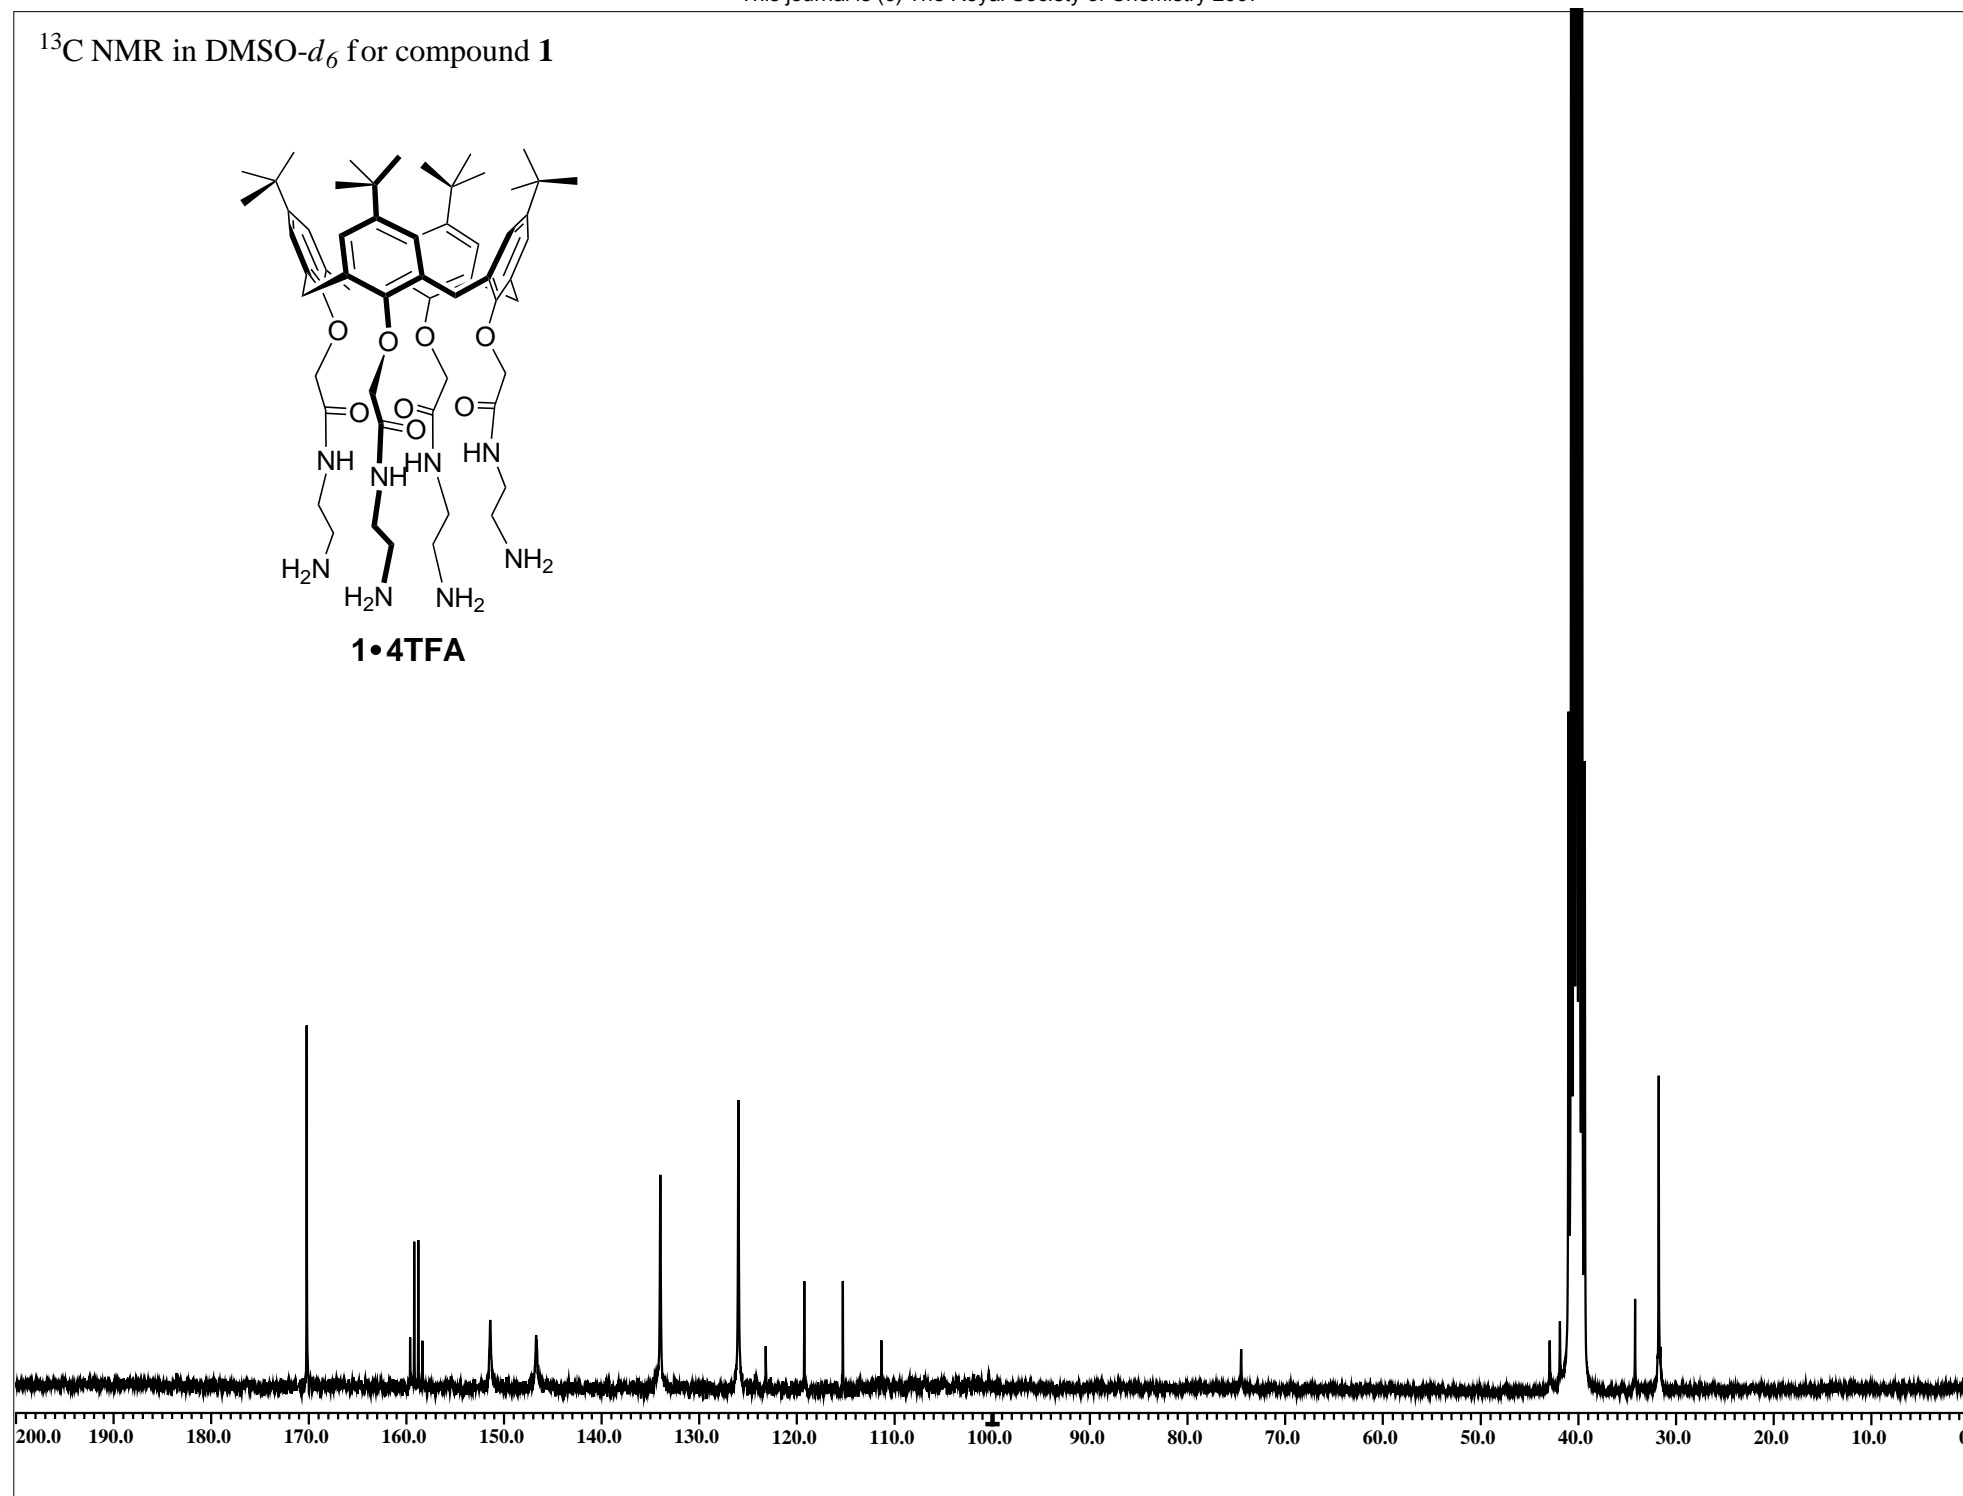

$^1\text{H}$  NMR in  $\text{DMSO-}d_6$  for compound **2**

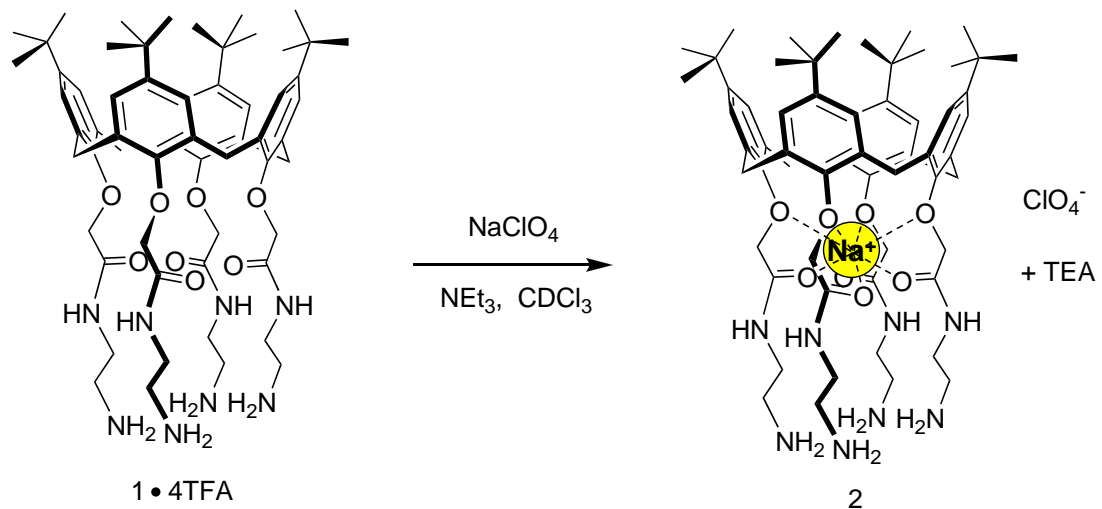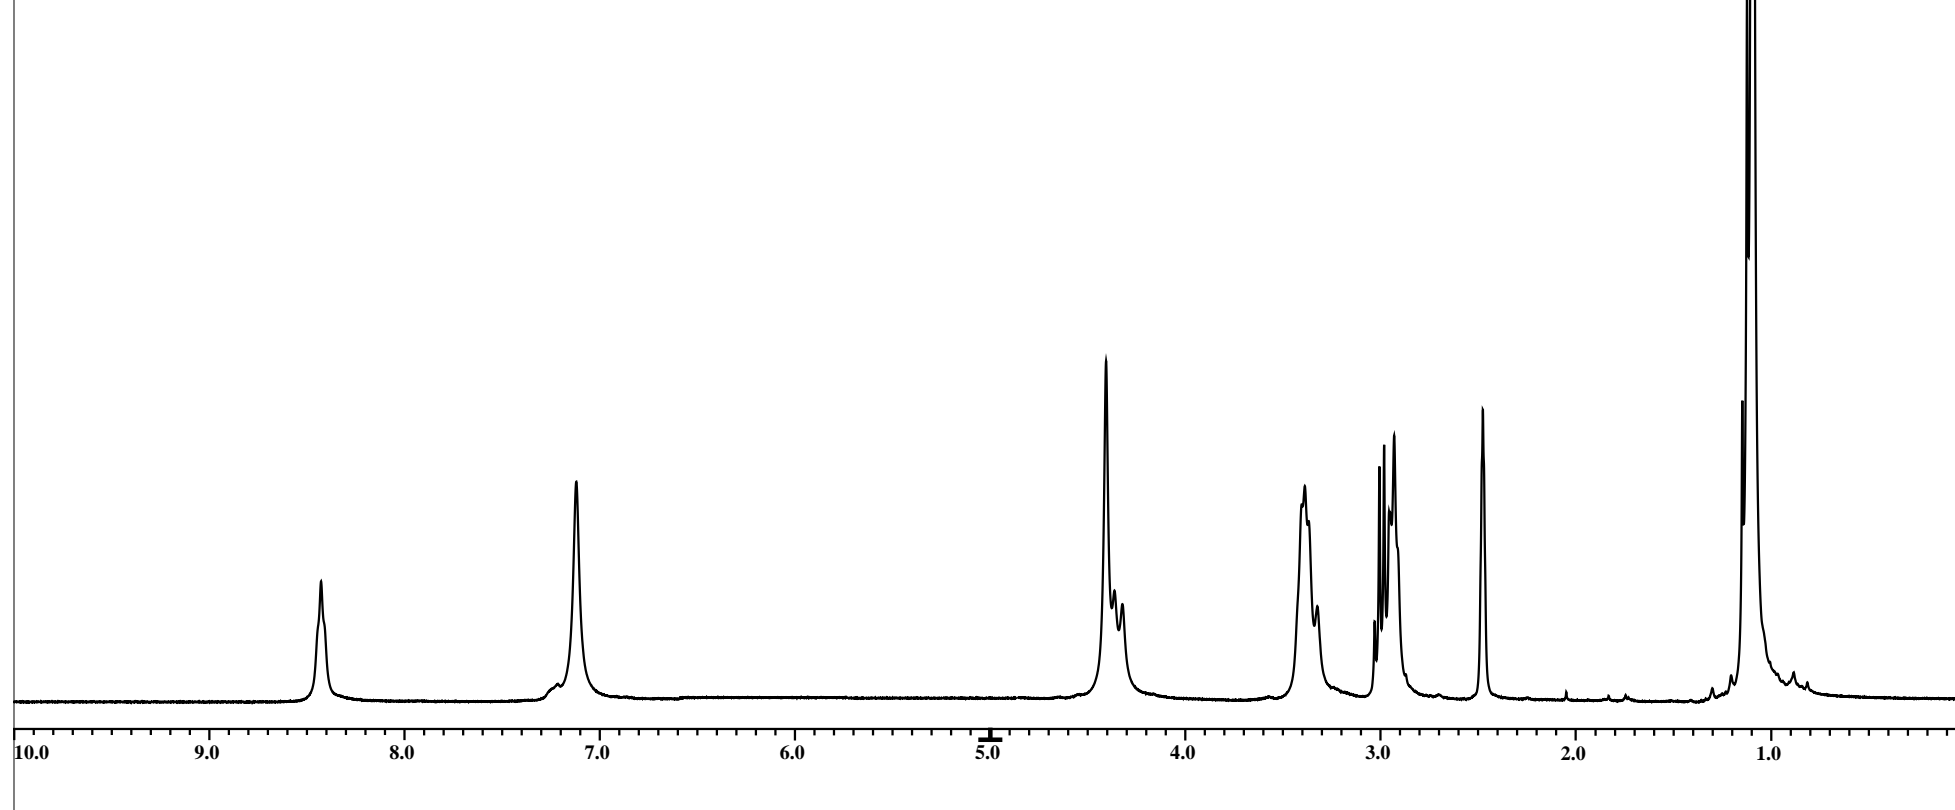

$^{13}\text{C}$  NMR in  $\text{DMSO-}d_6$  for compound **2**

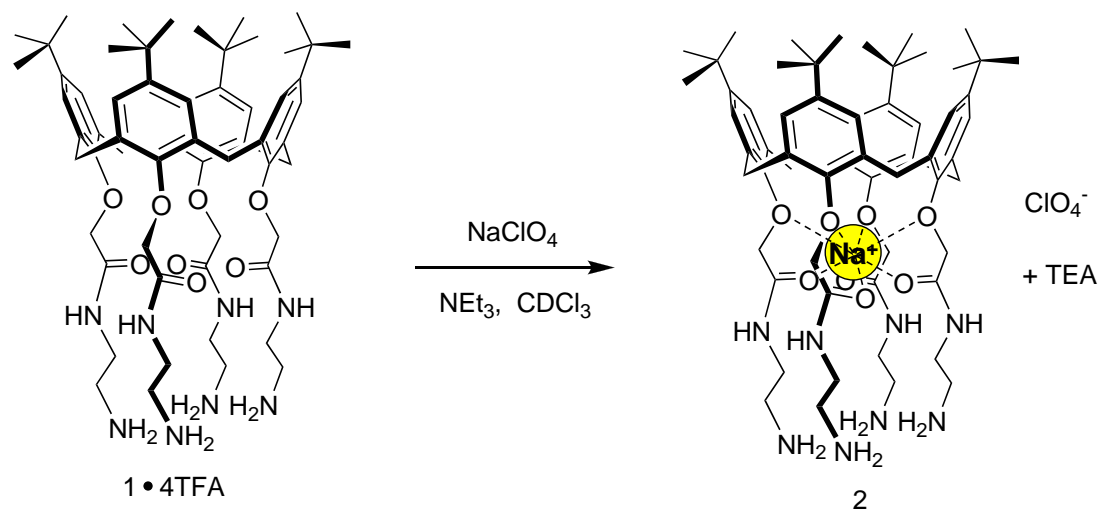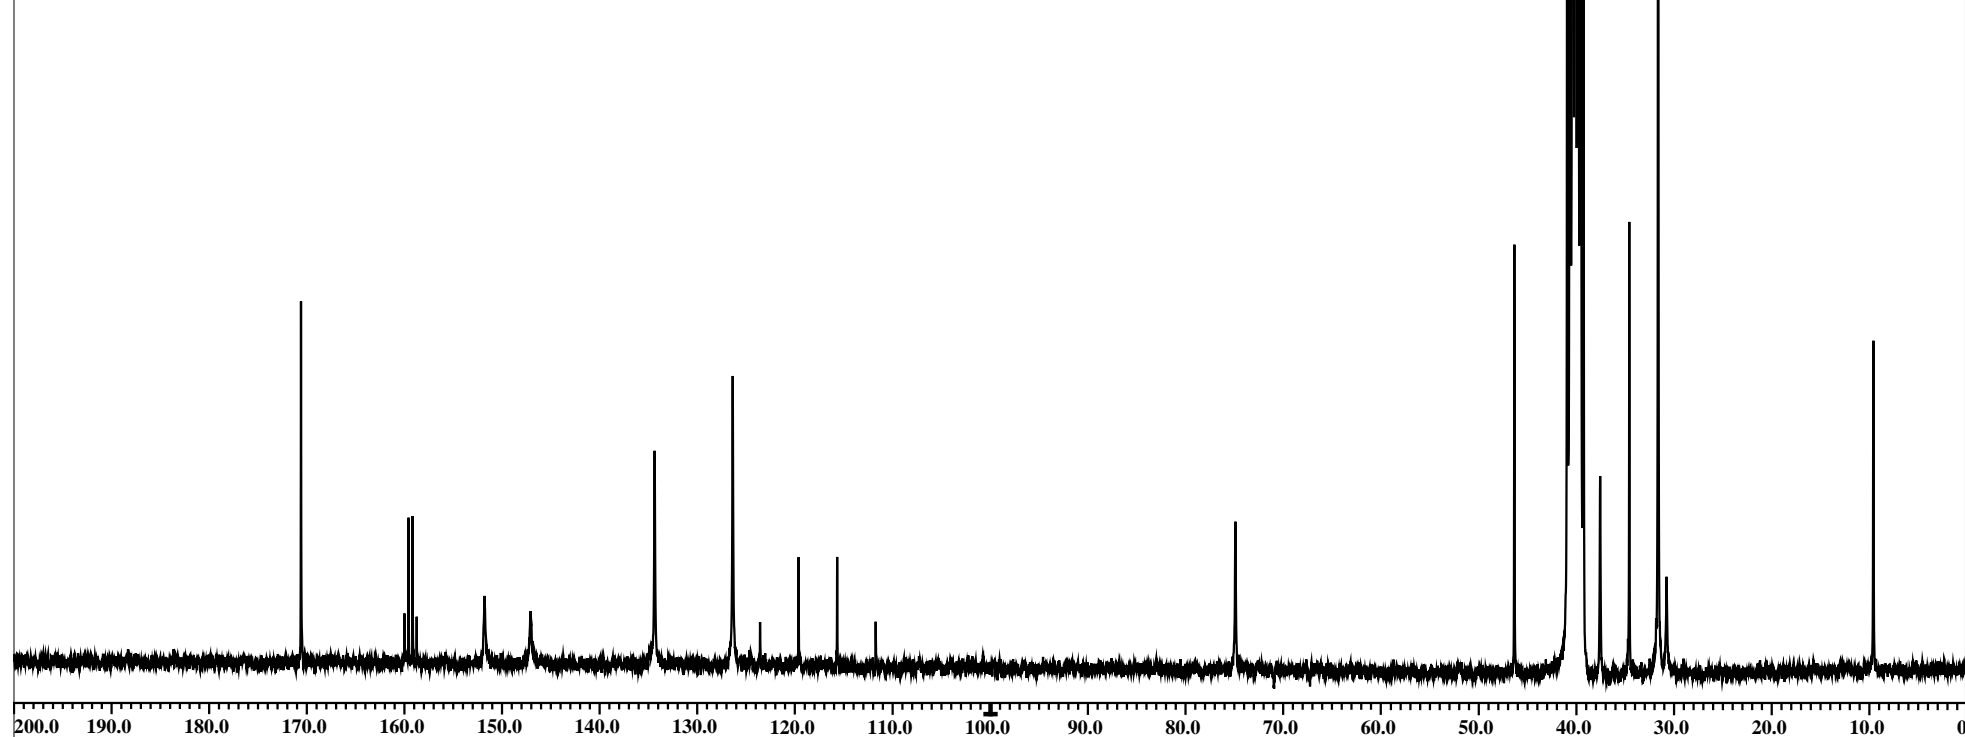

$^1\text{H}$  NMR in  $\text{DMSO-}d_6$  for compound **3**

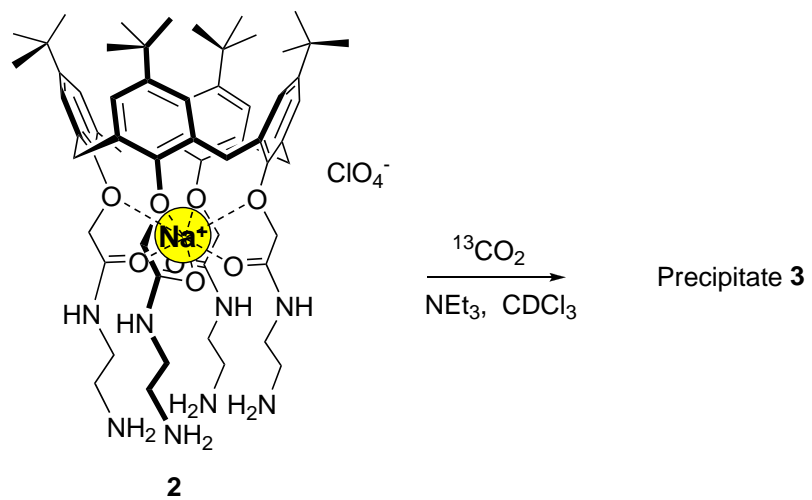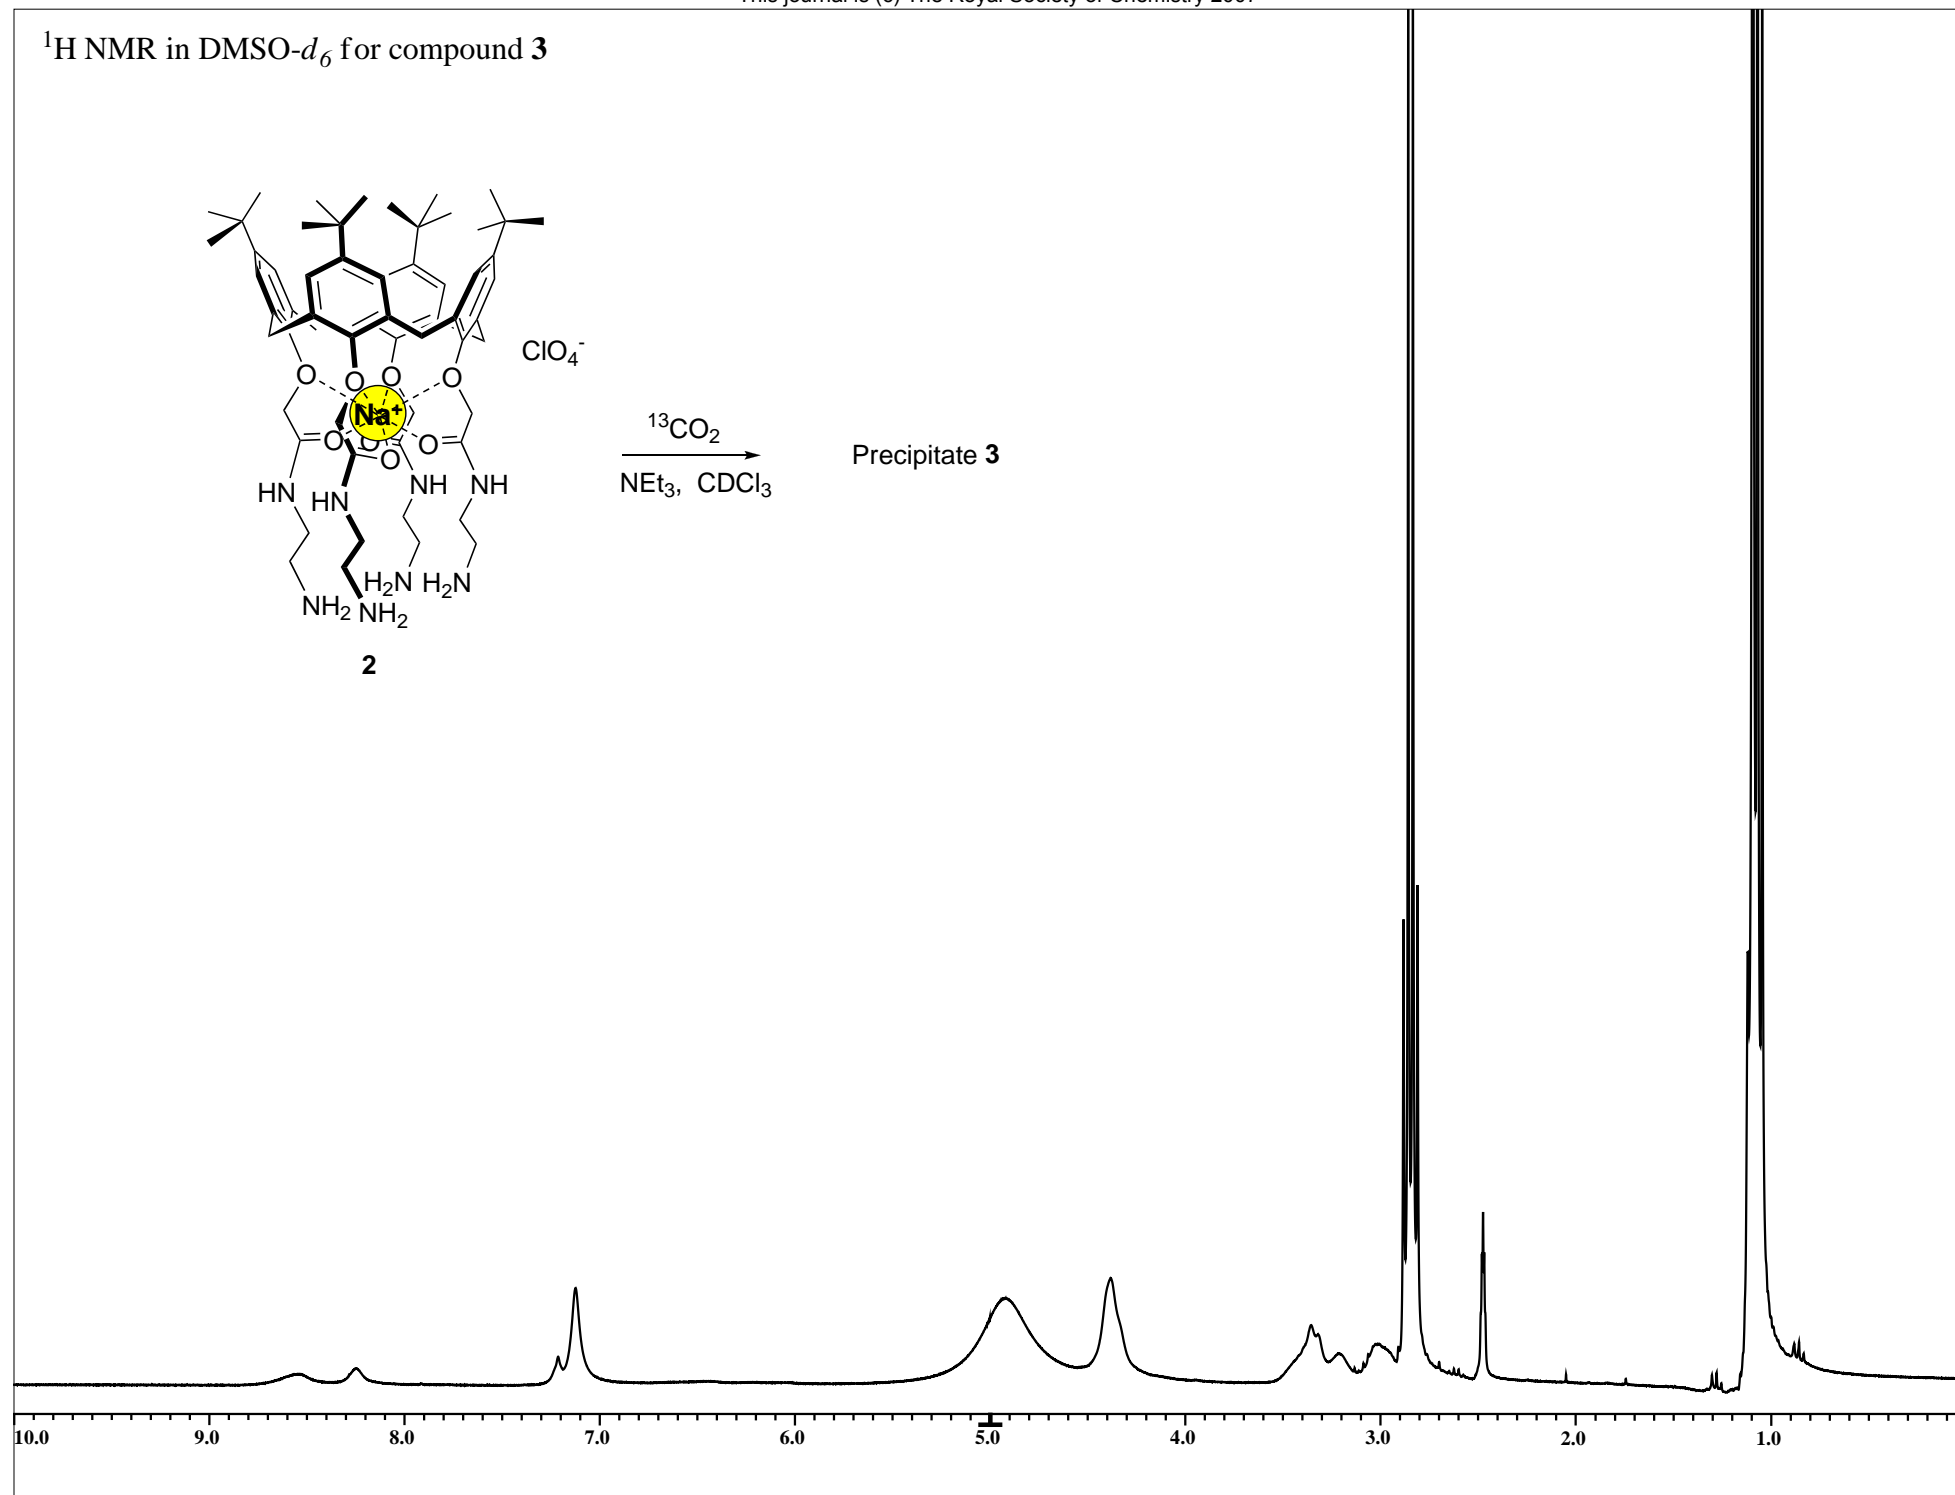

$^{13}\text{C}$  NMR in  $\text{DMSO-}d_6$  for compound **3**

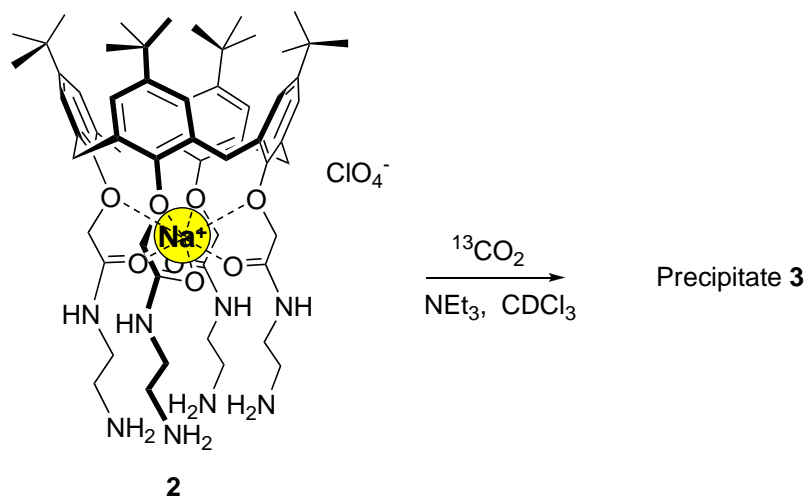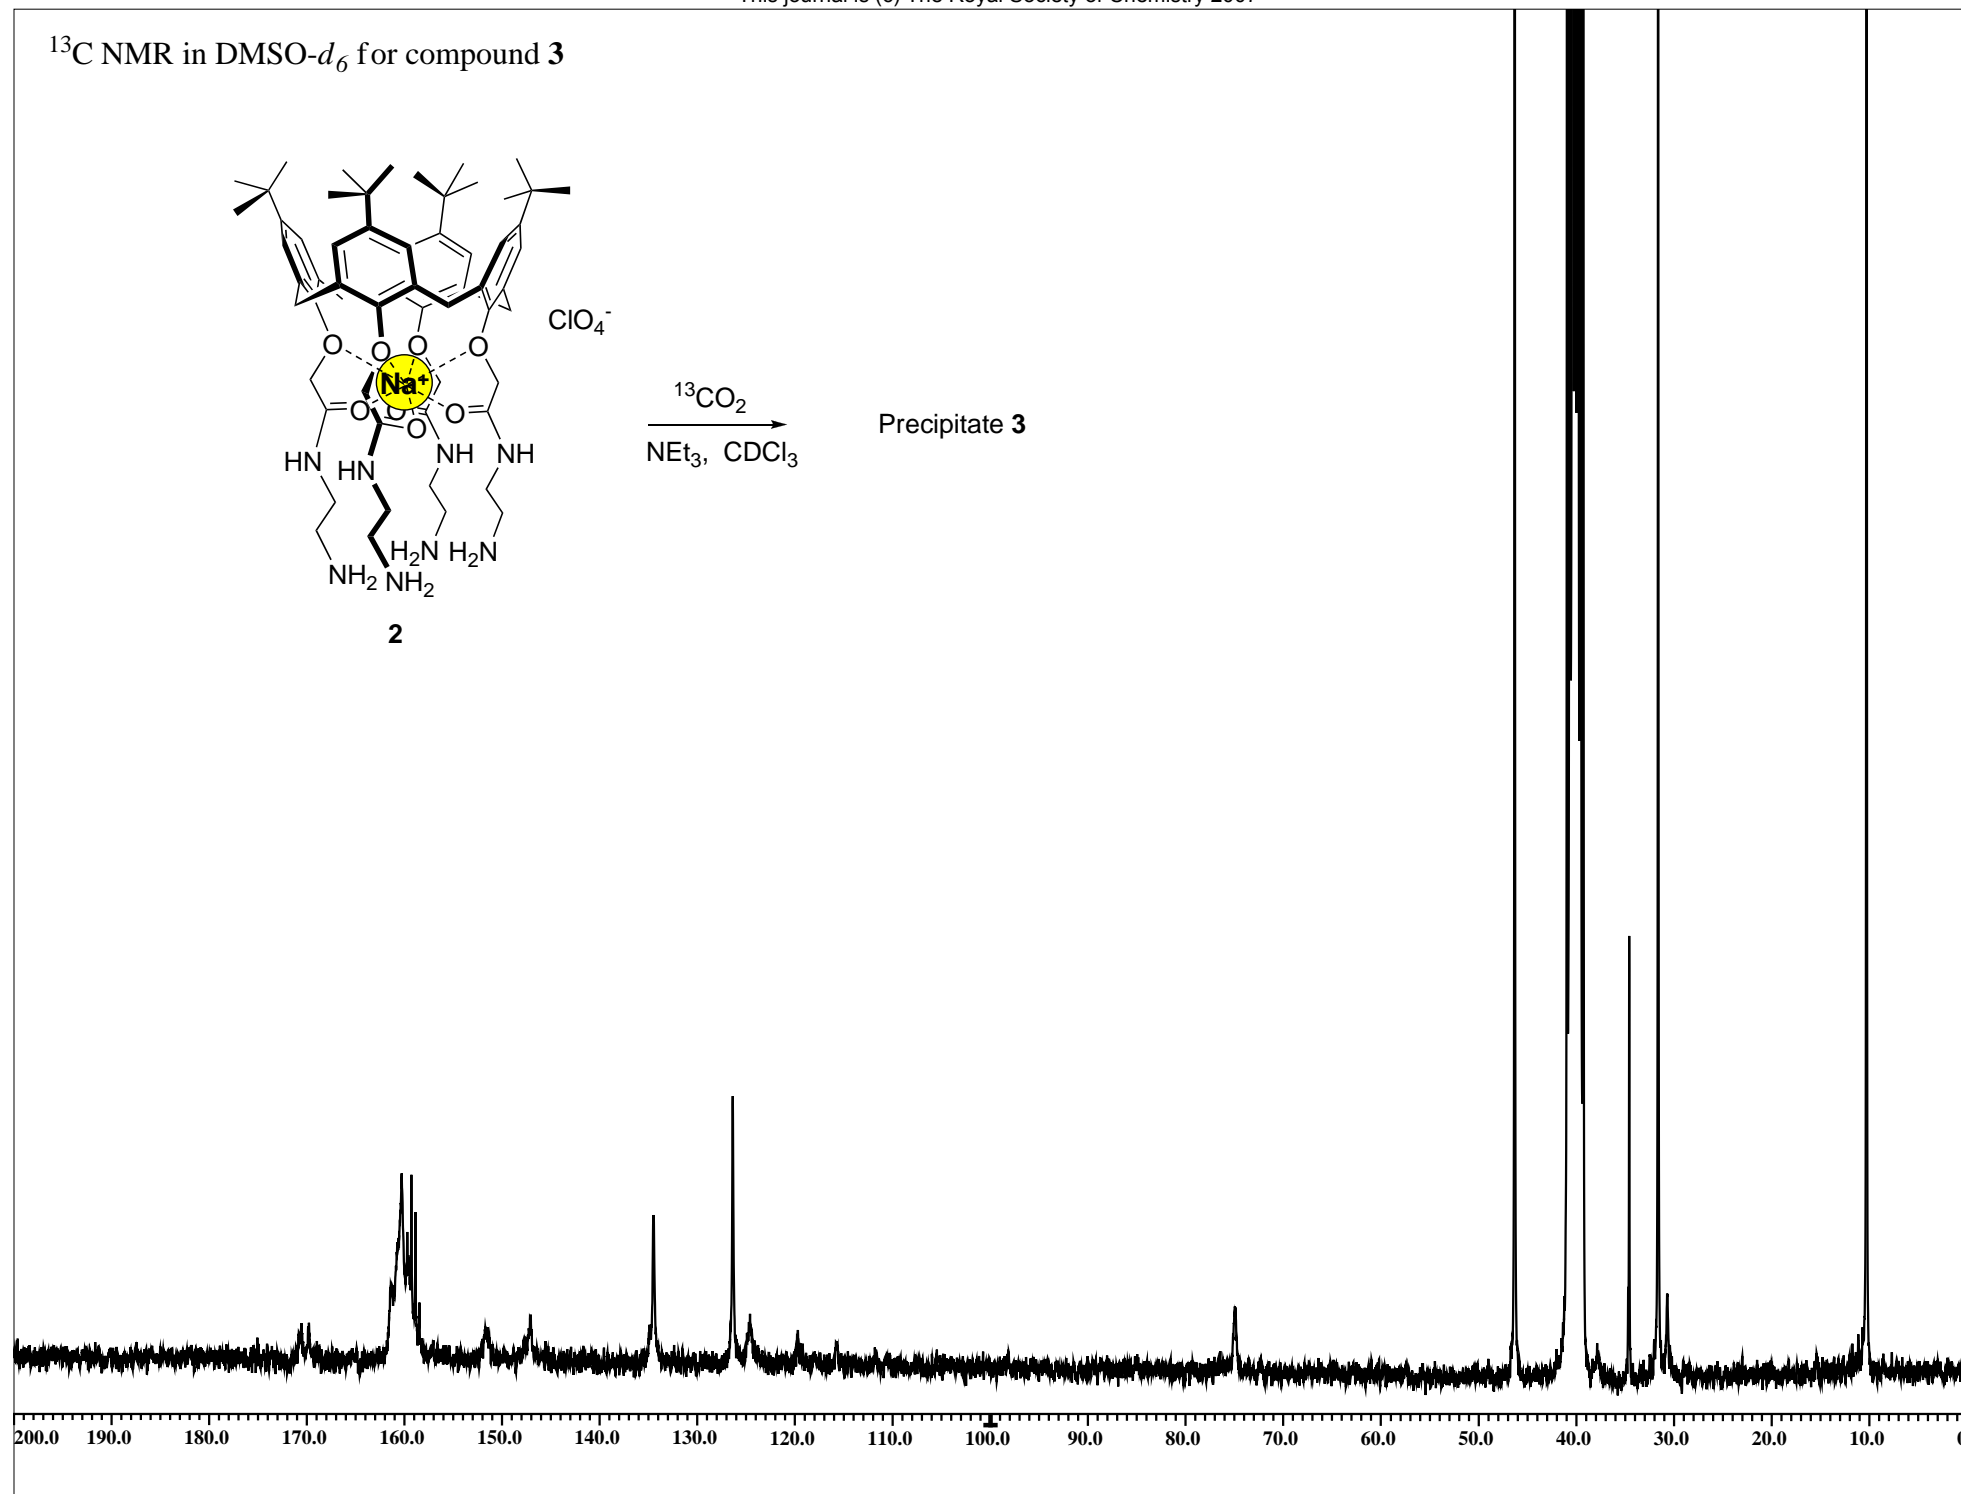

$^1\text{H}$  NMR in  $\text{CDCl}_3$  for compound **7**

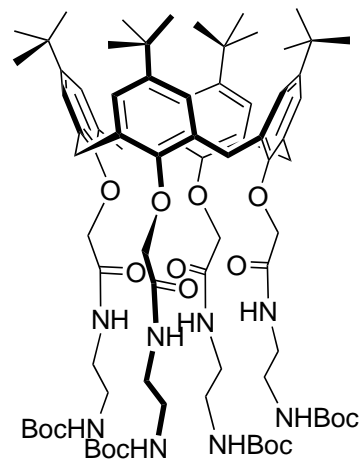

S12

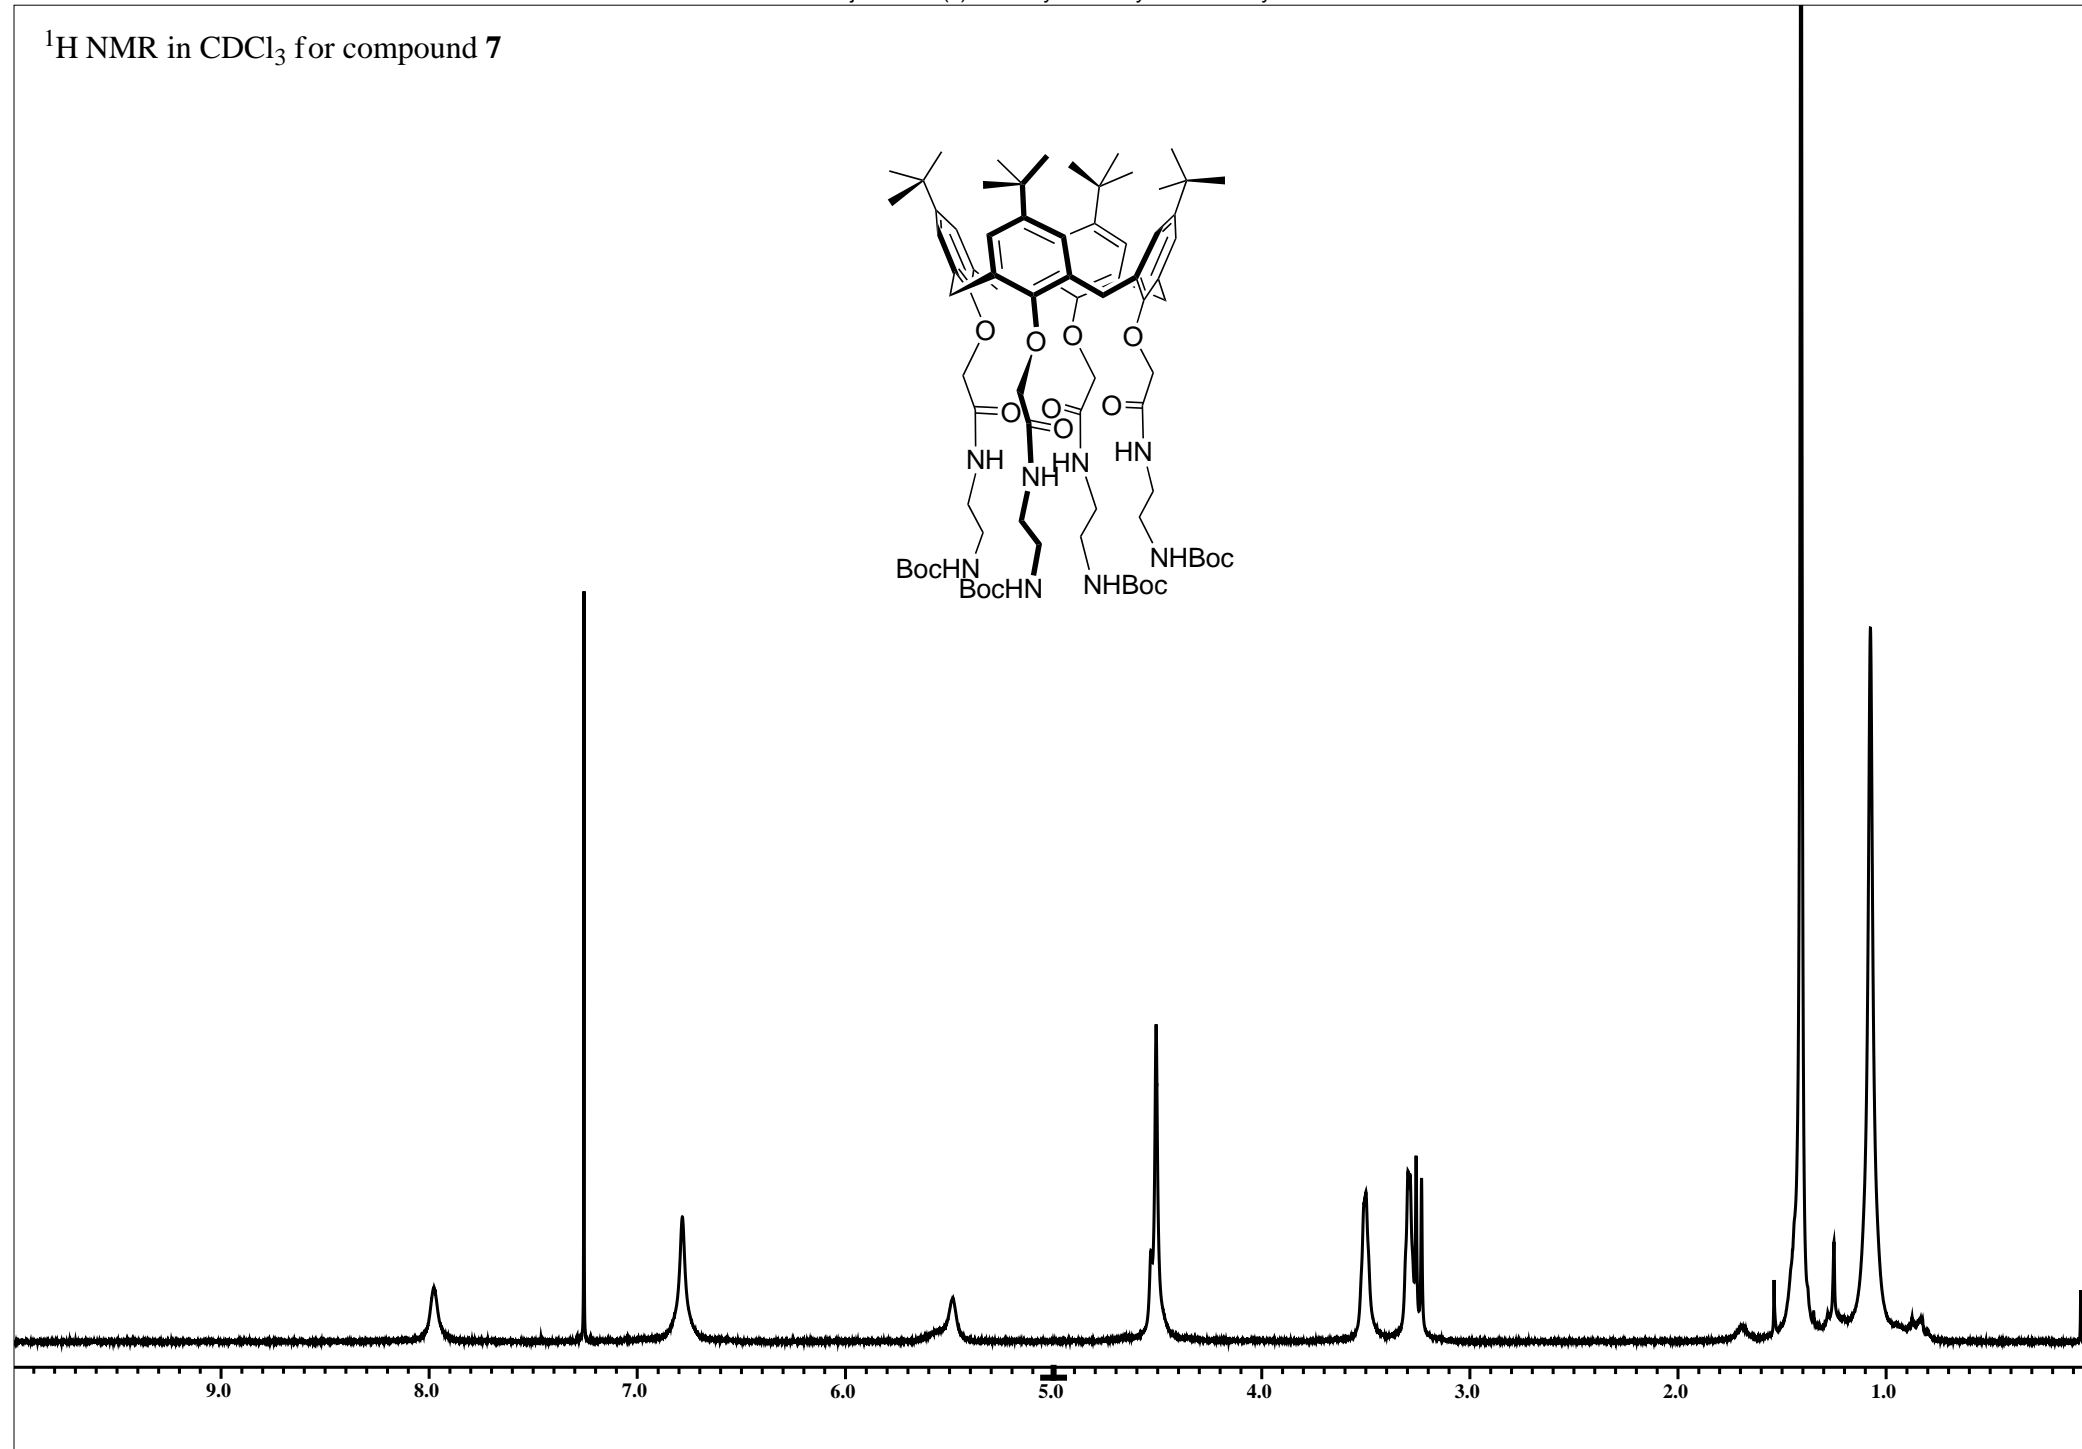

$^{13}\text{C}$  NMR in  $\text{CDCl}_3$  for compound **7**

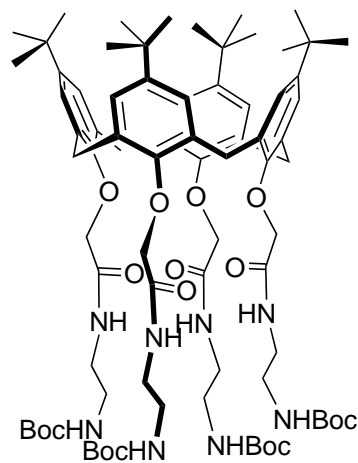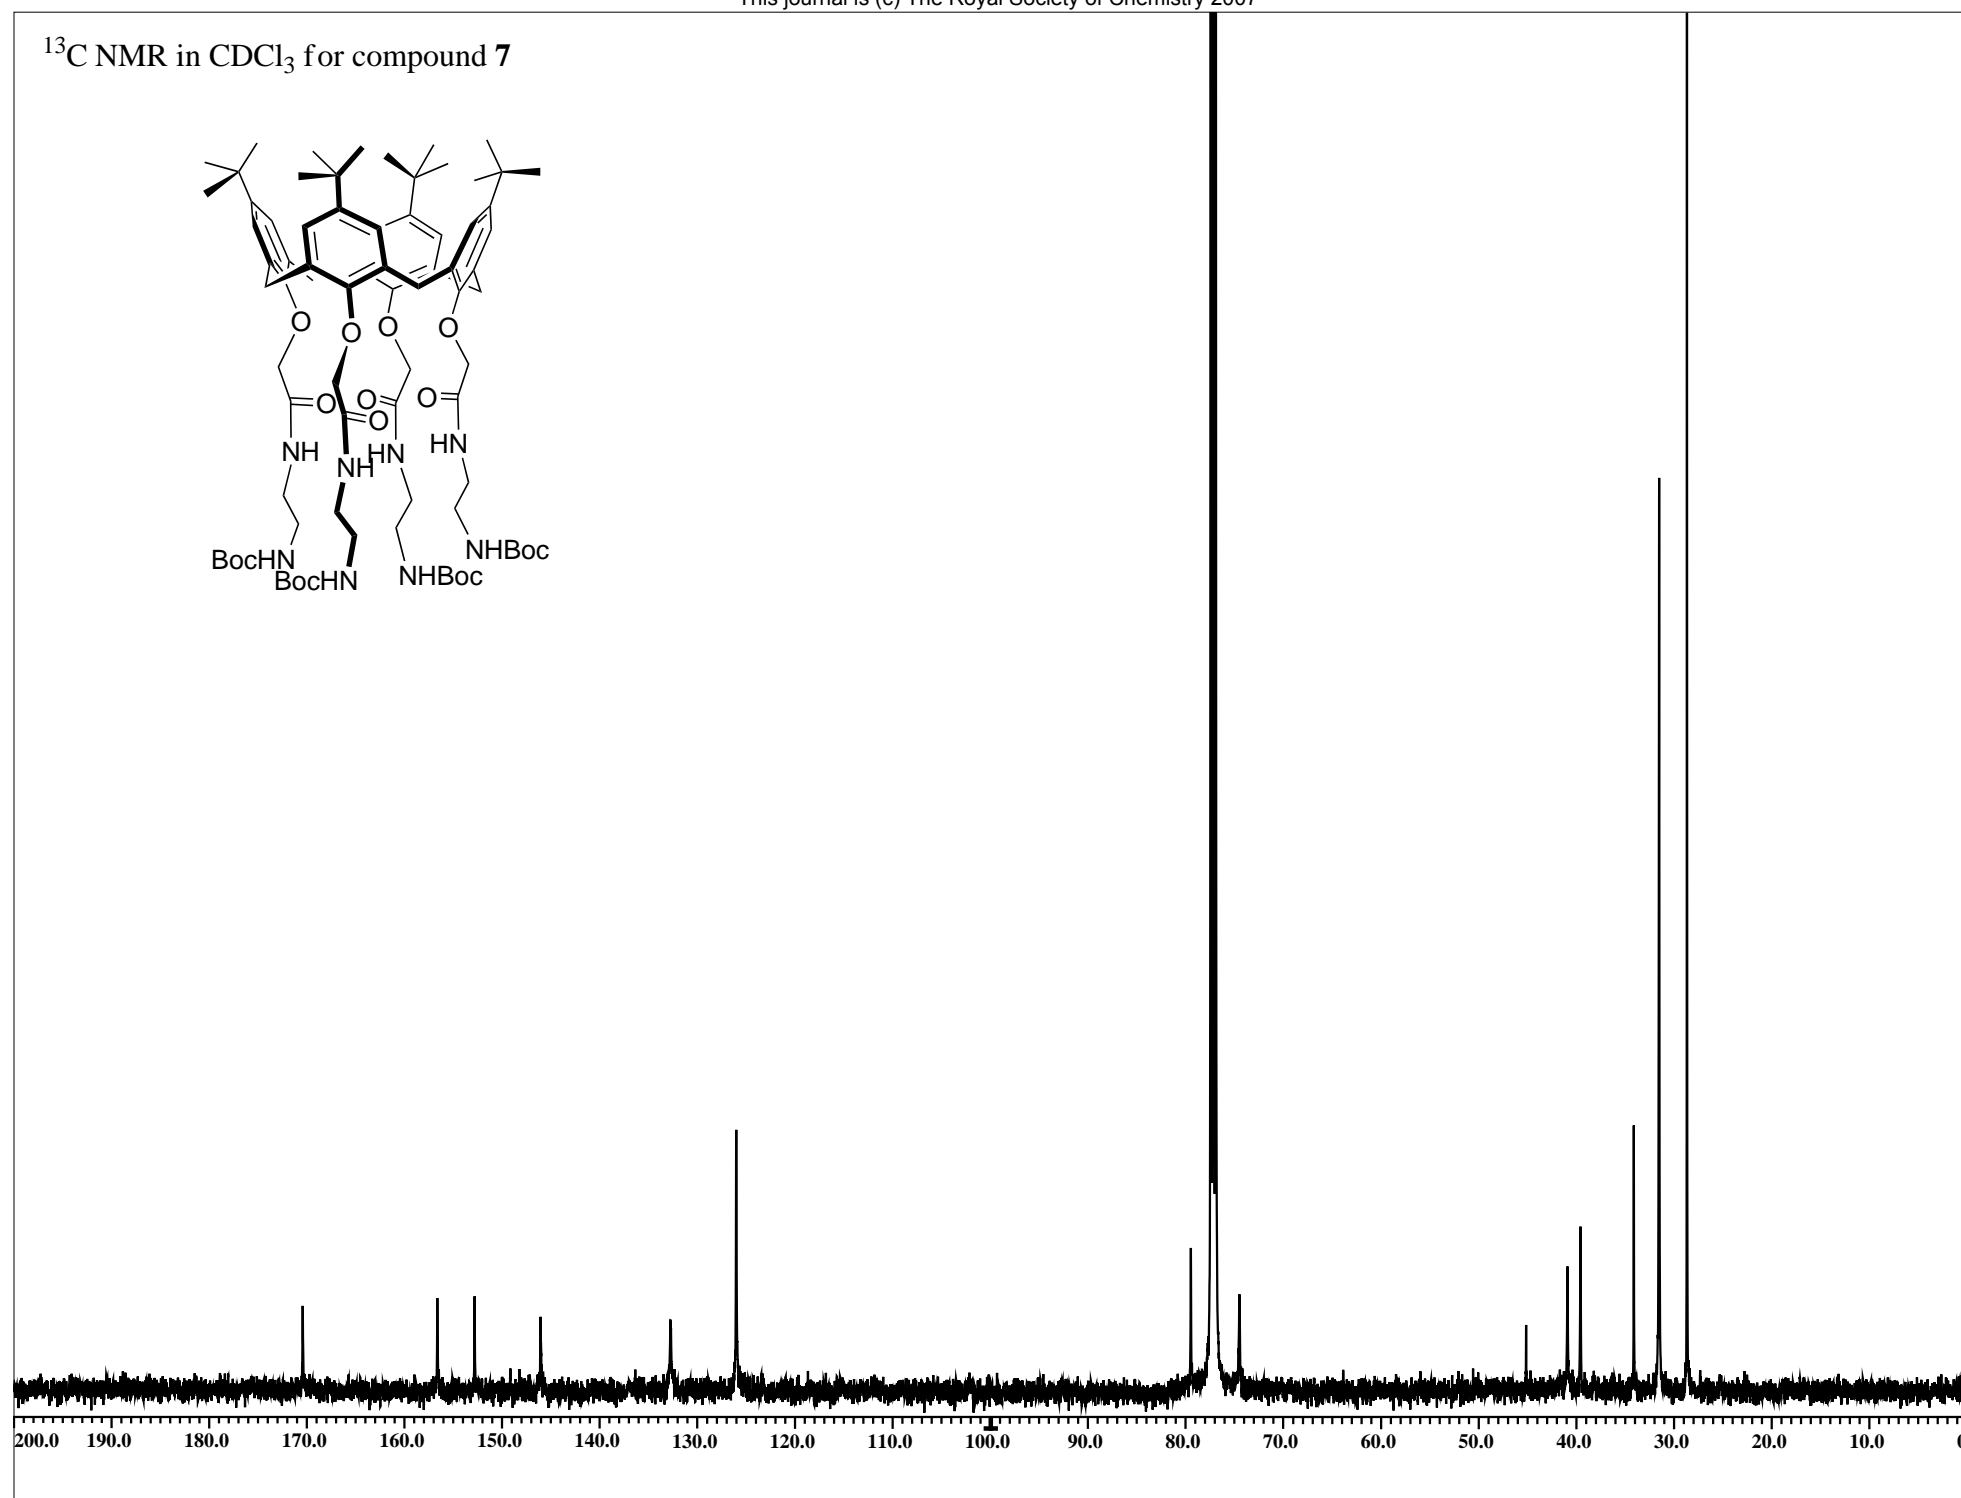

S14

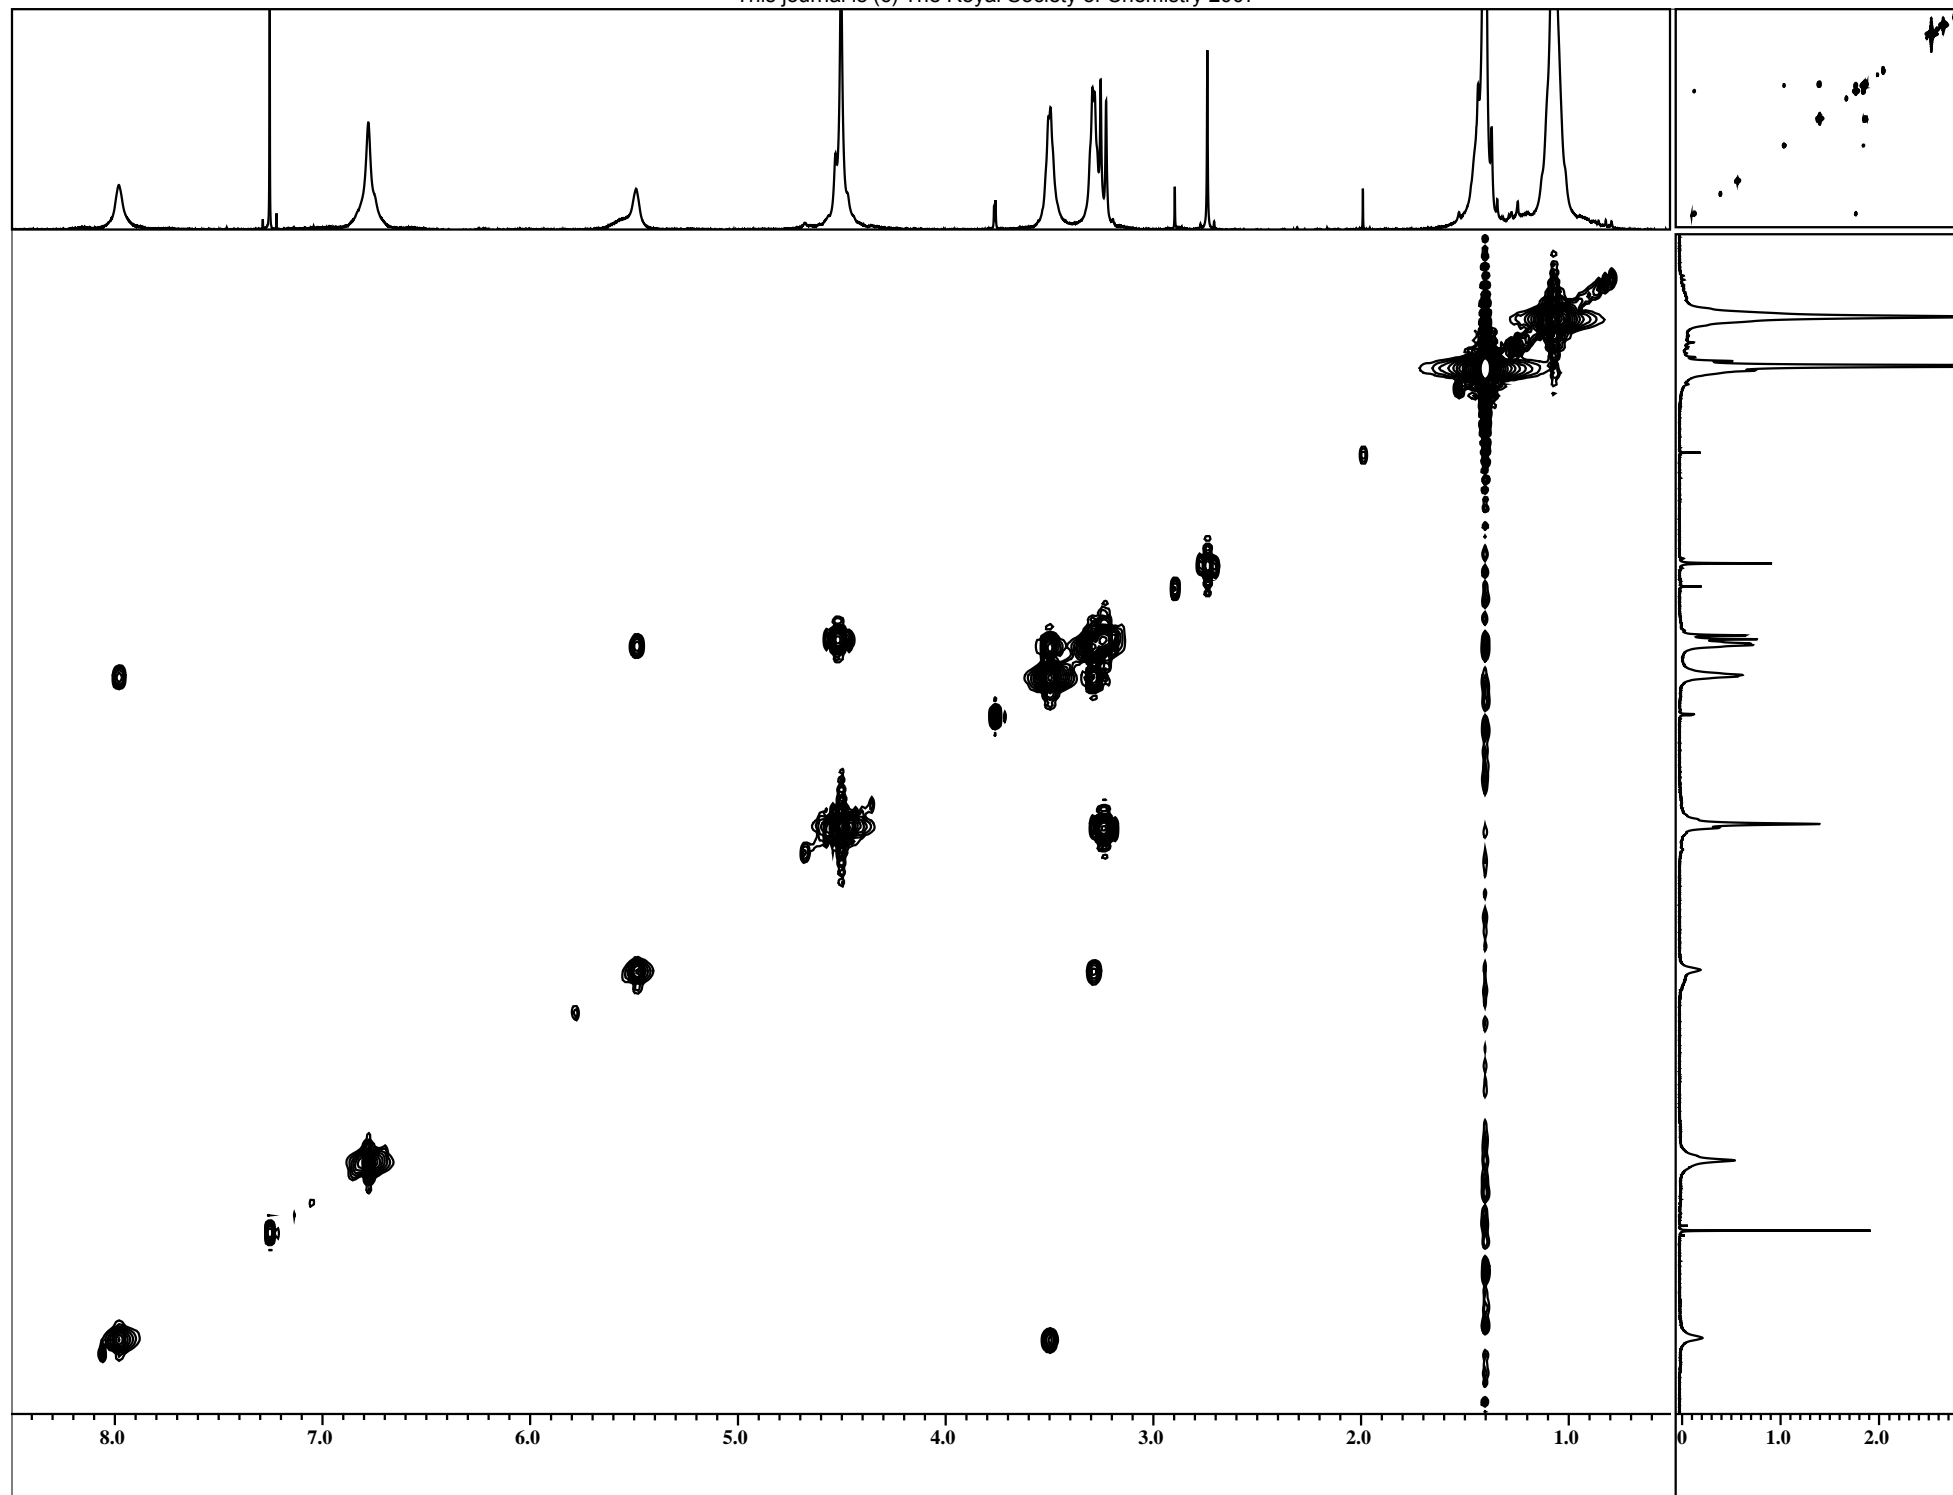

$^1\text{H}$  NMR in  $\text{DMSO-}d_6$  for compound **8**

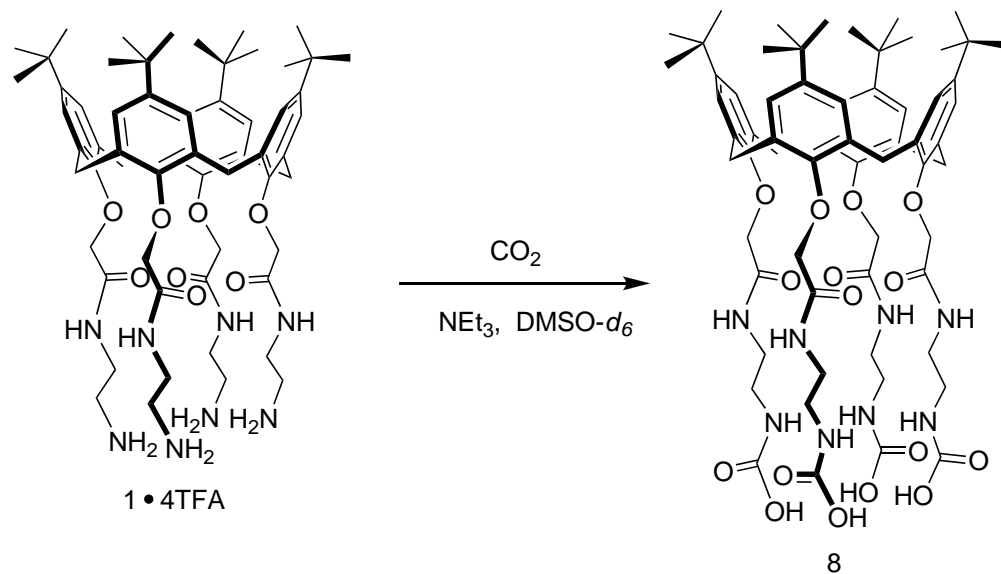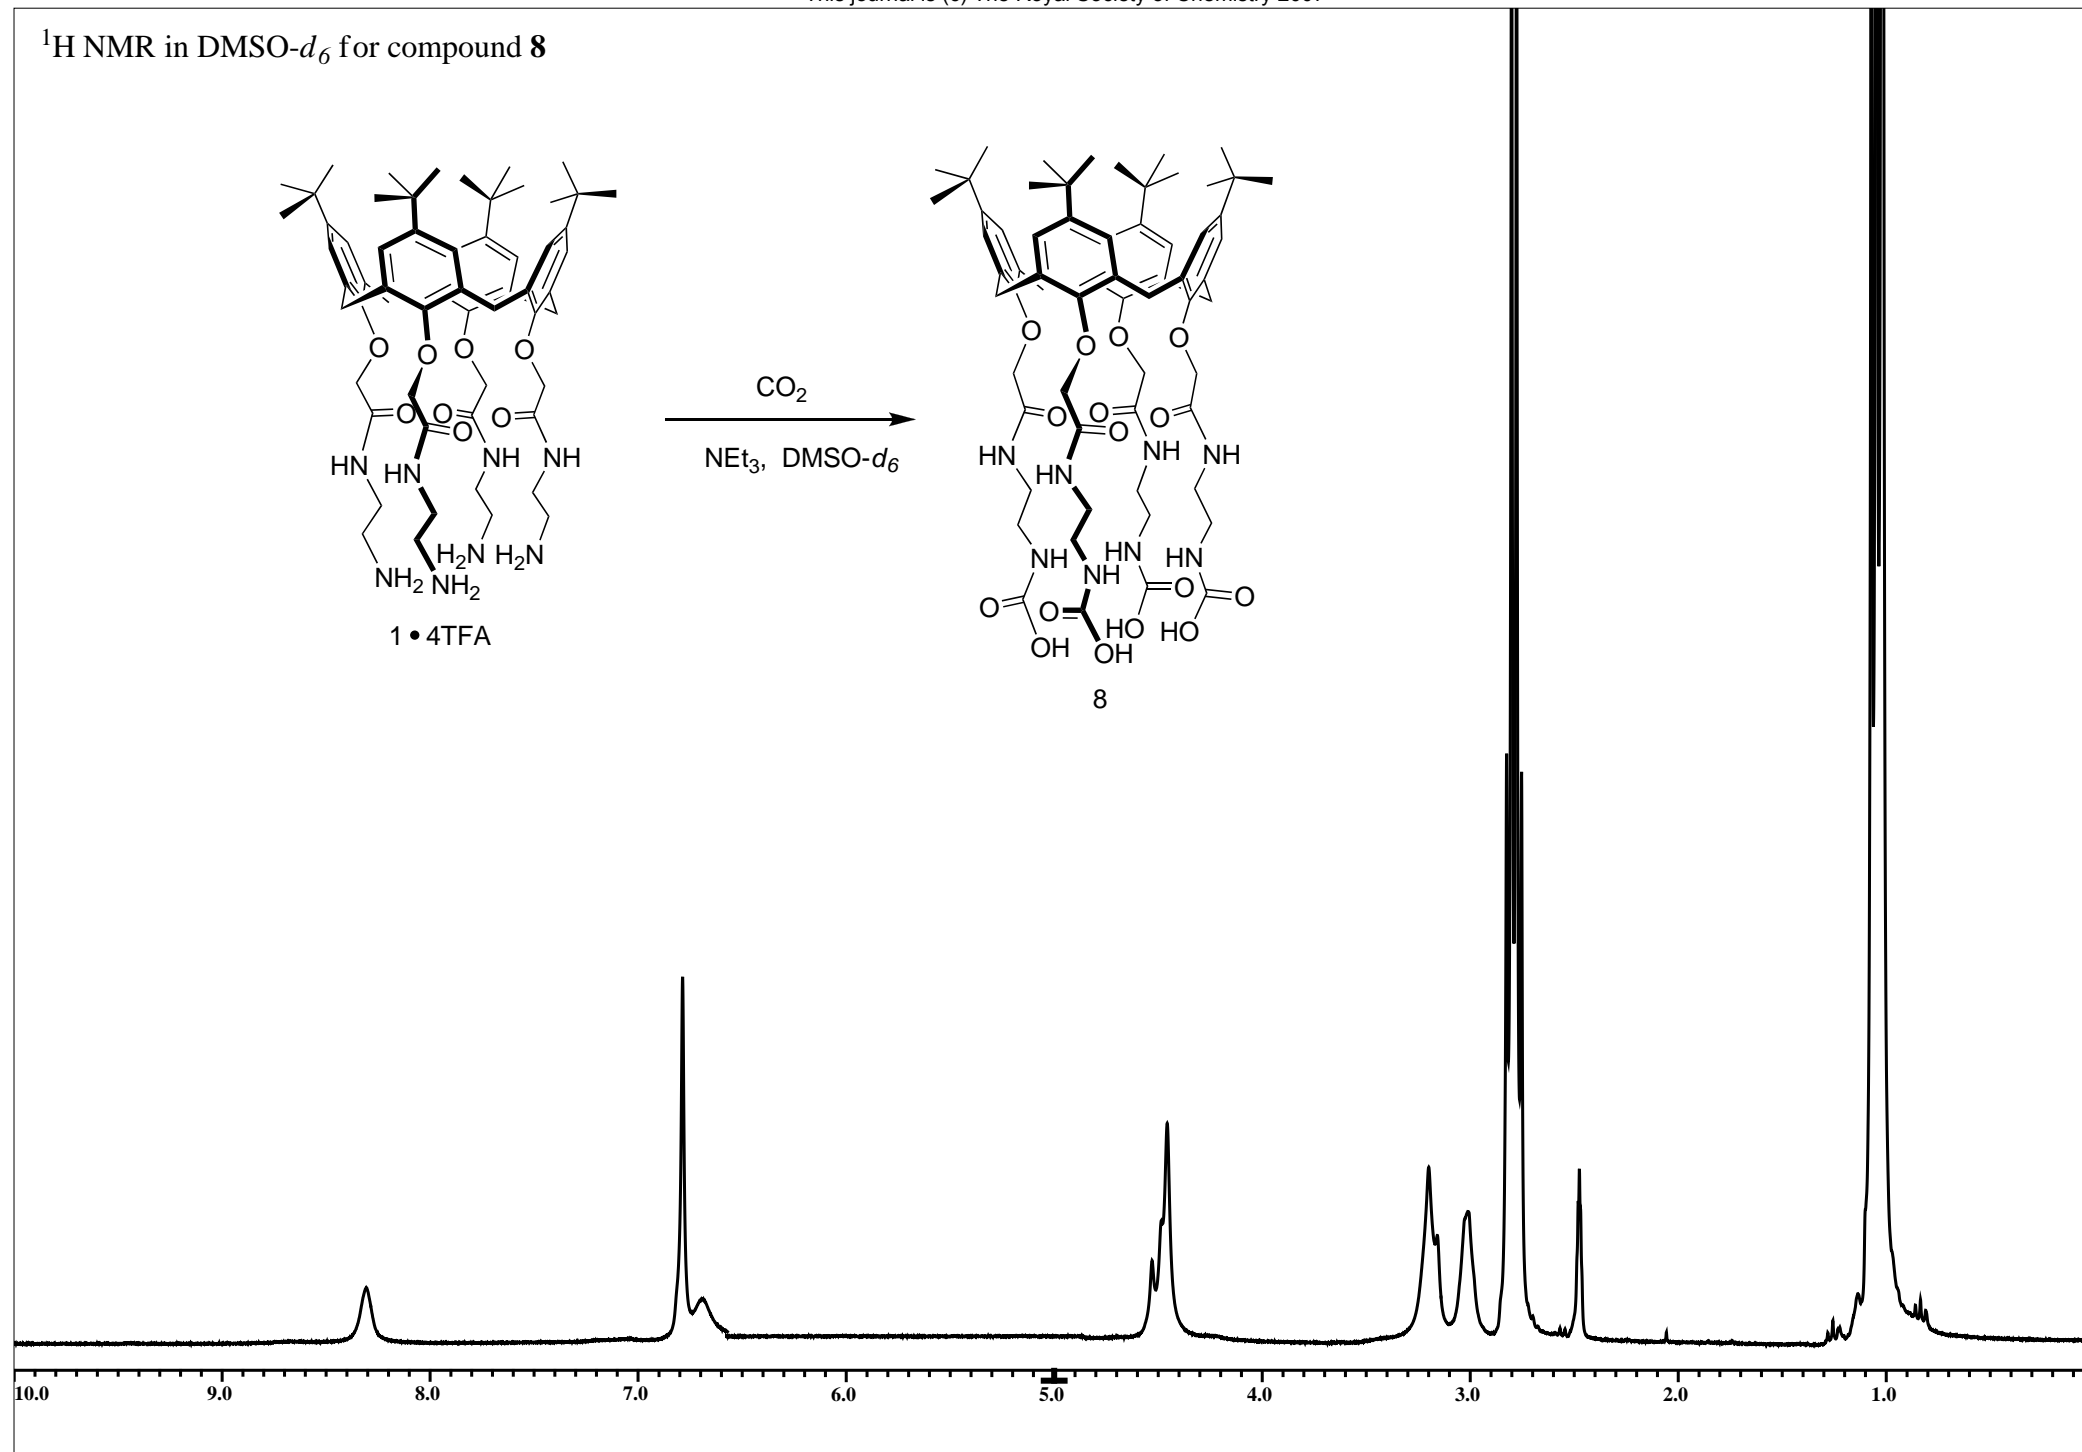

S16

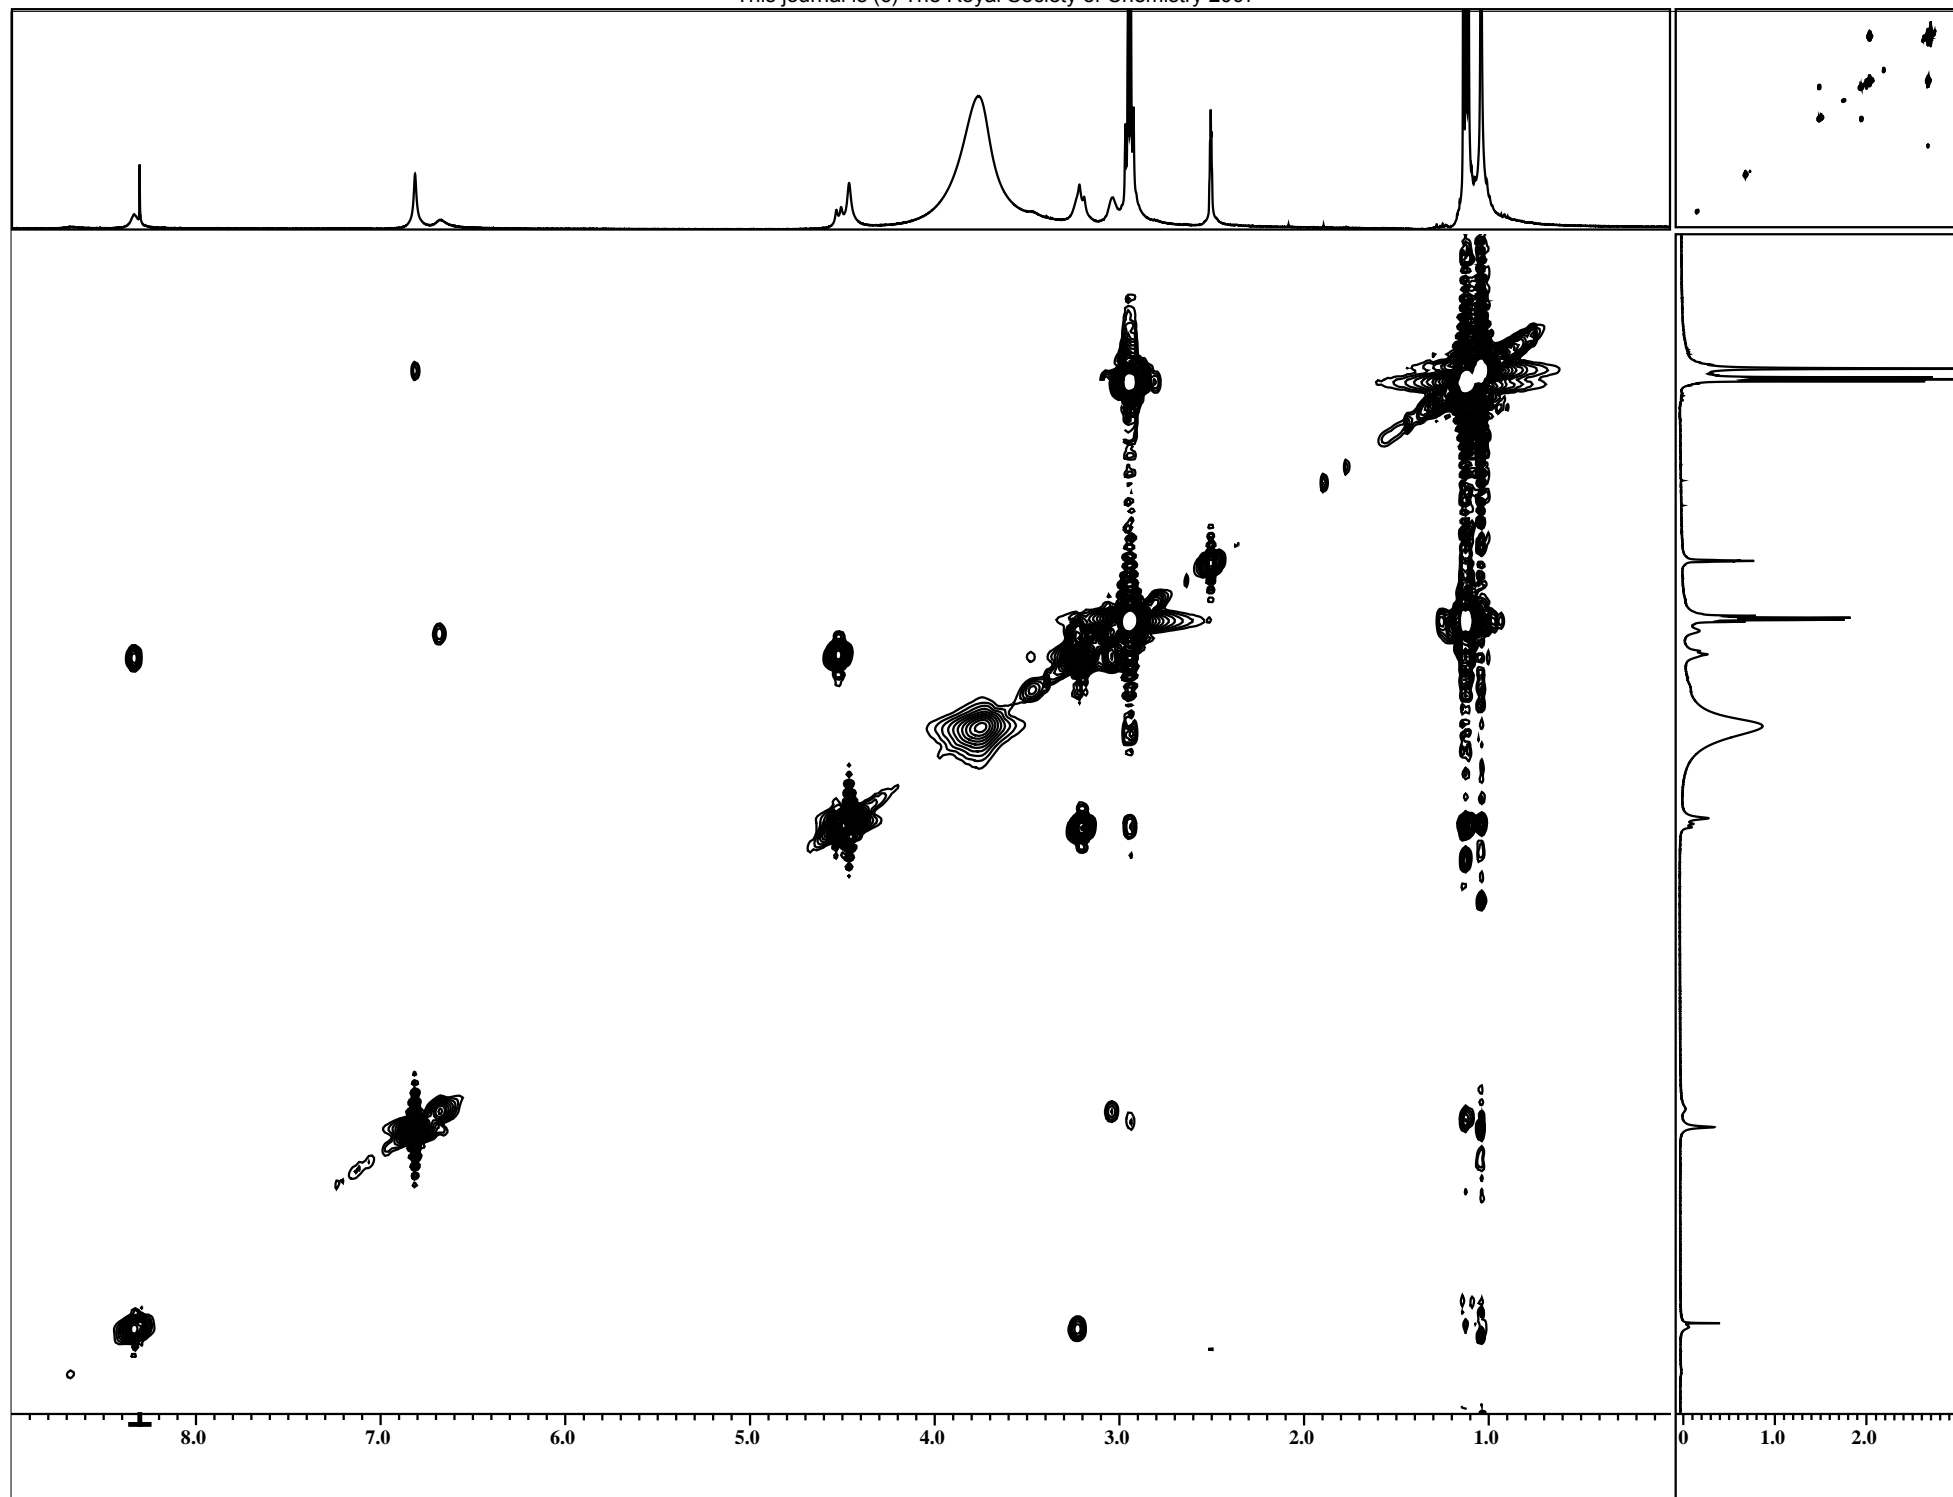

$^1\text{H}$  NMR in  $\text{DMSO-}d_6$  for compound **9**

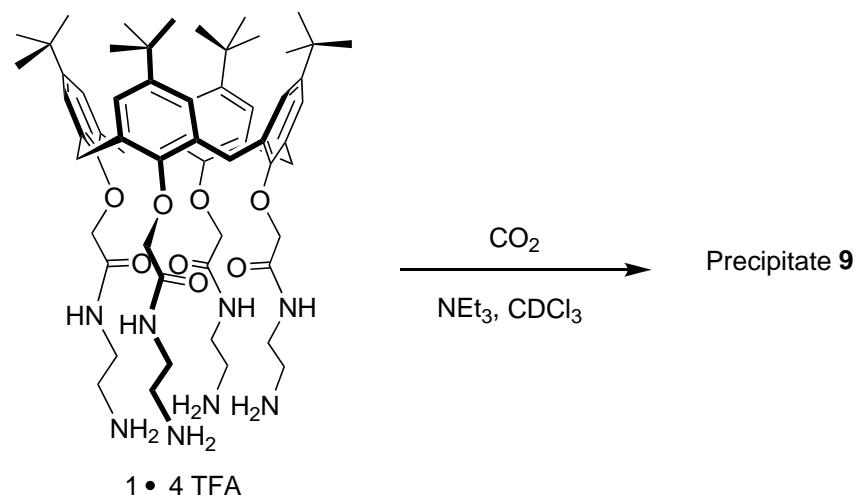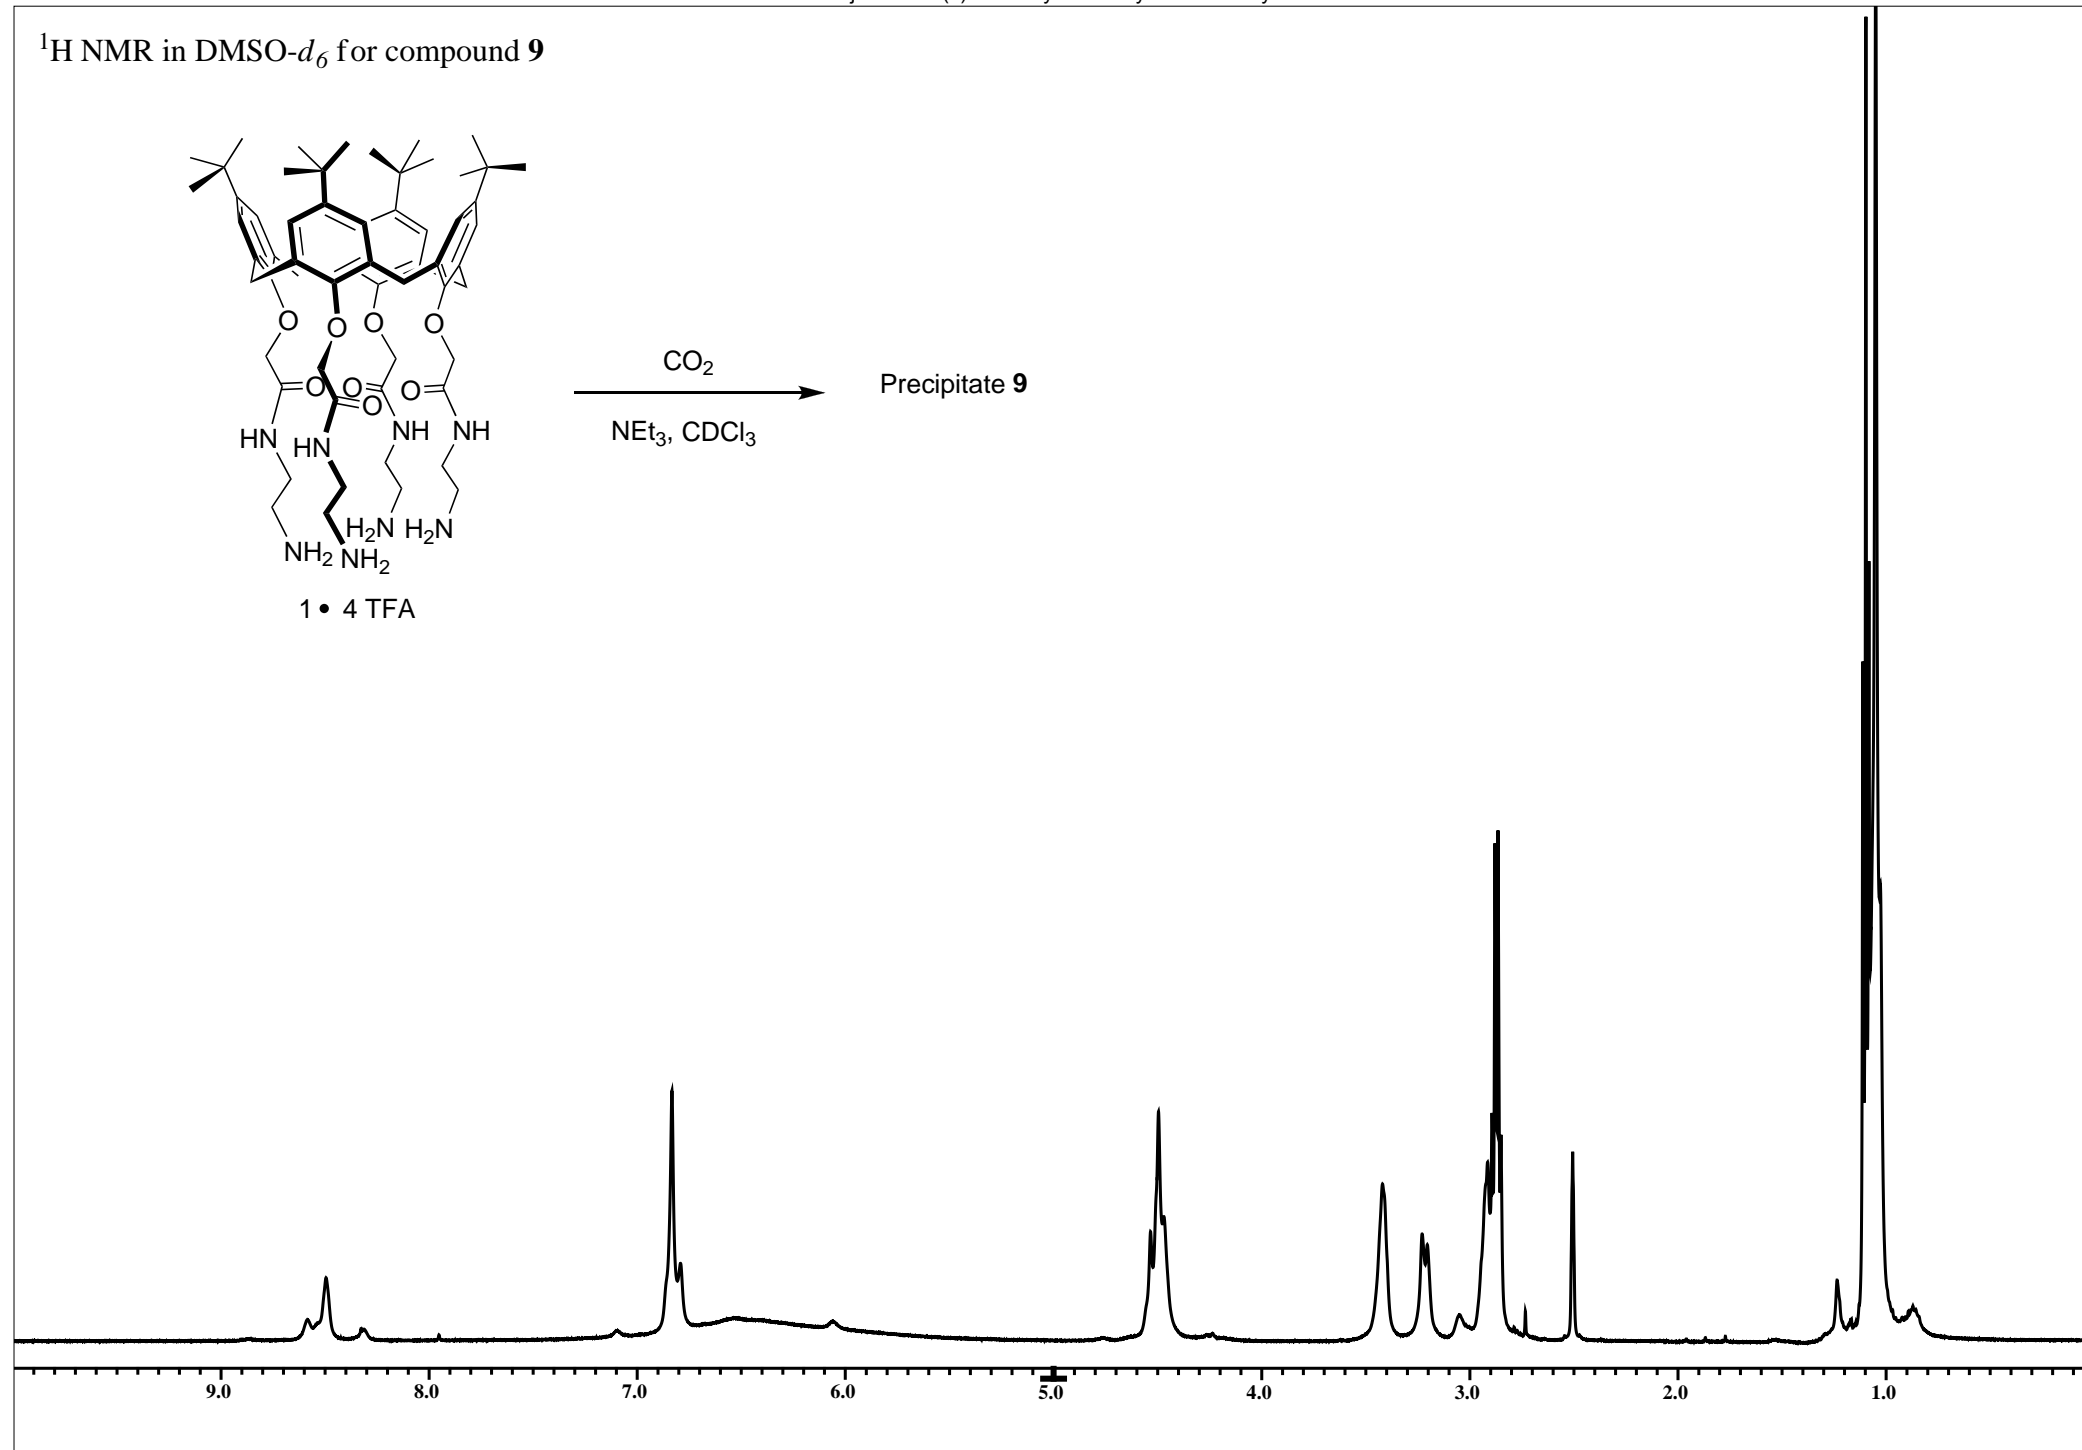

$^1\text{H}$  NMR in  $\text{DMSO}-d_6$  for compound **1** with TEA

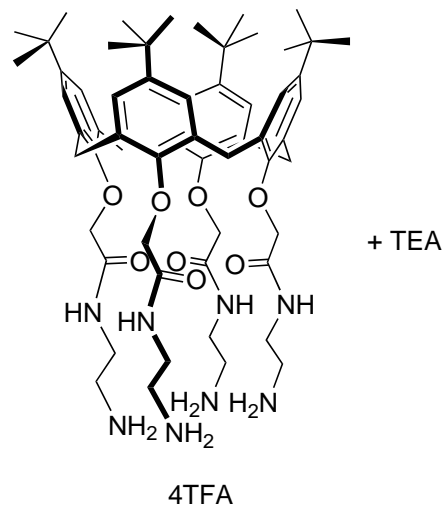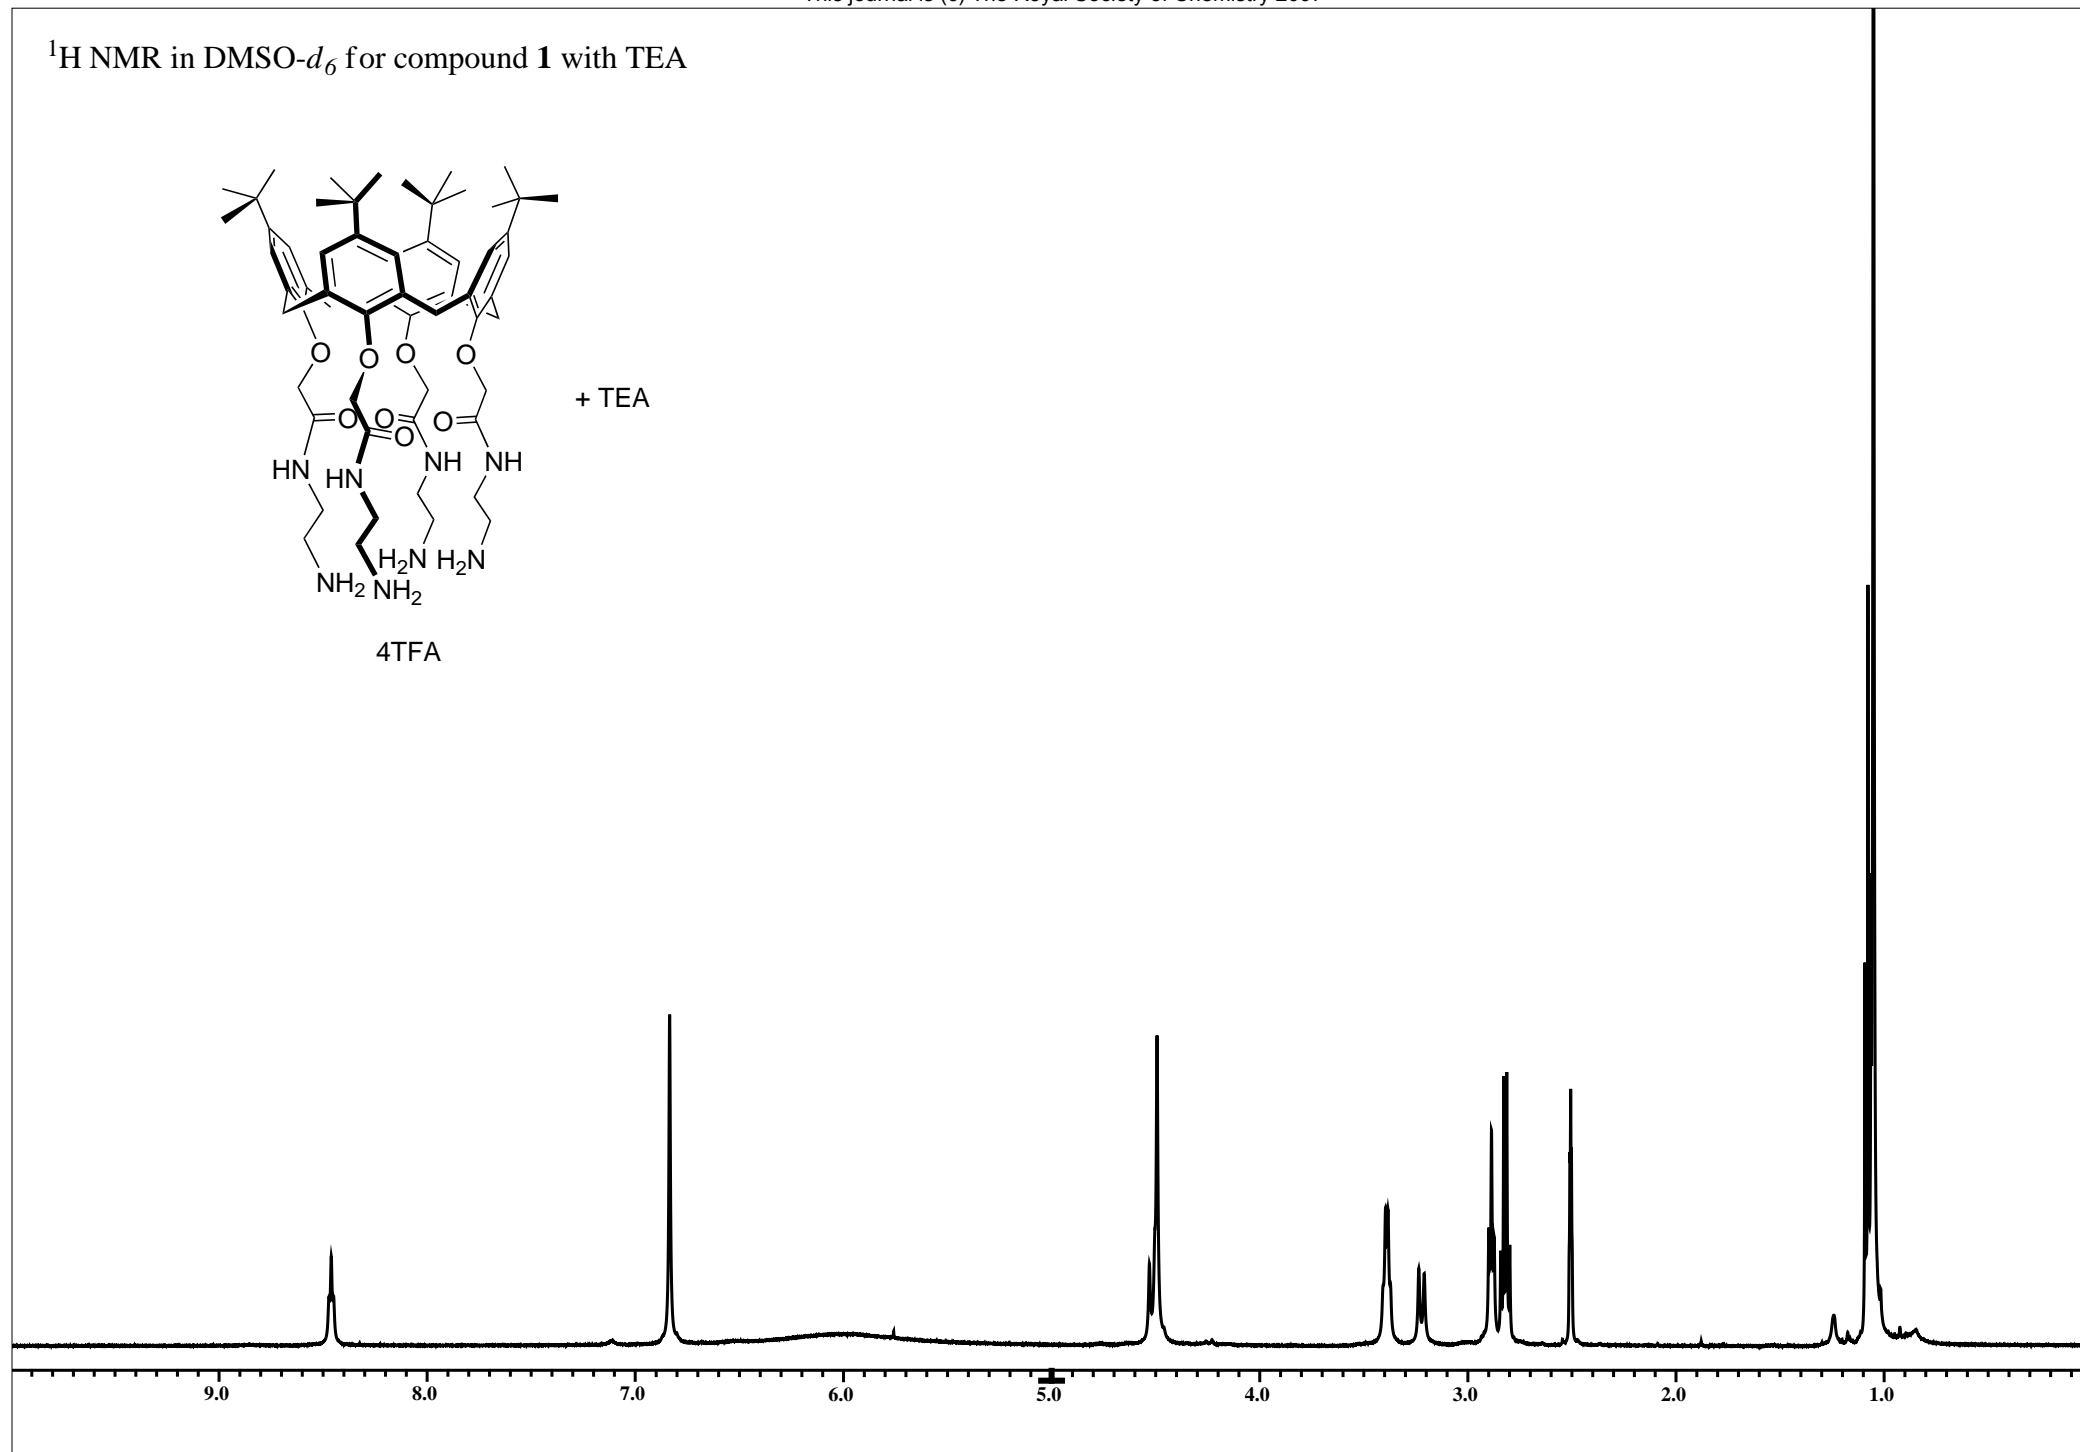

$^1\text{H}$  NMR in  $\text{DMSO-}d_6$  for compound **1** with  $\text{KClO}_4$

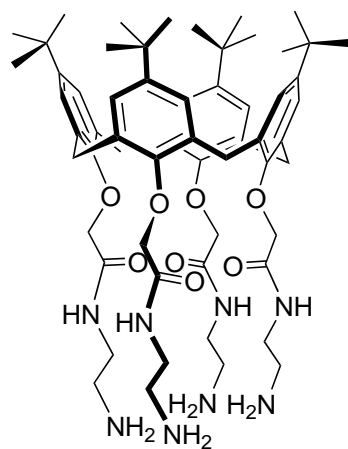

+ TEA  
+  $\text{KClO}_4$

**4TFA**

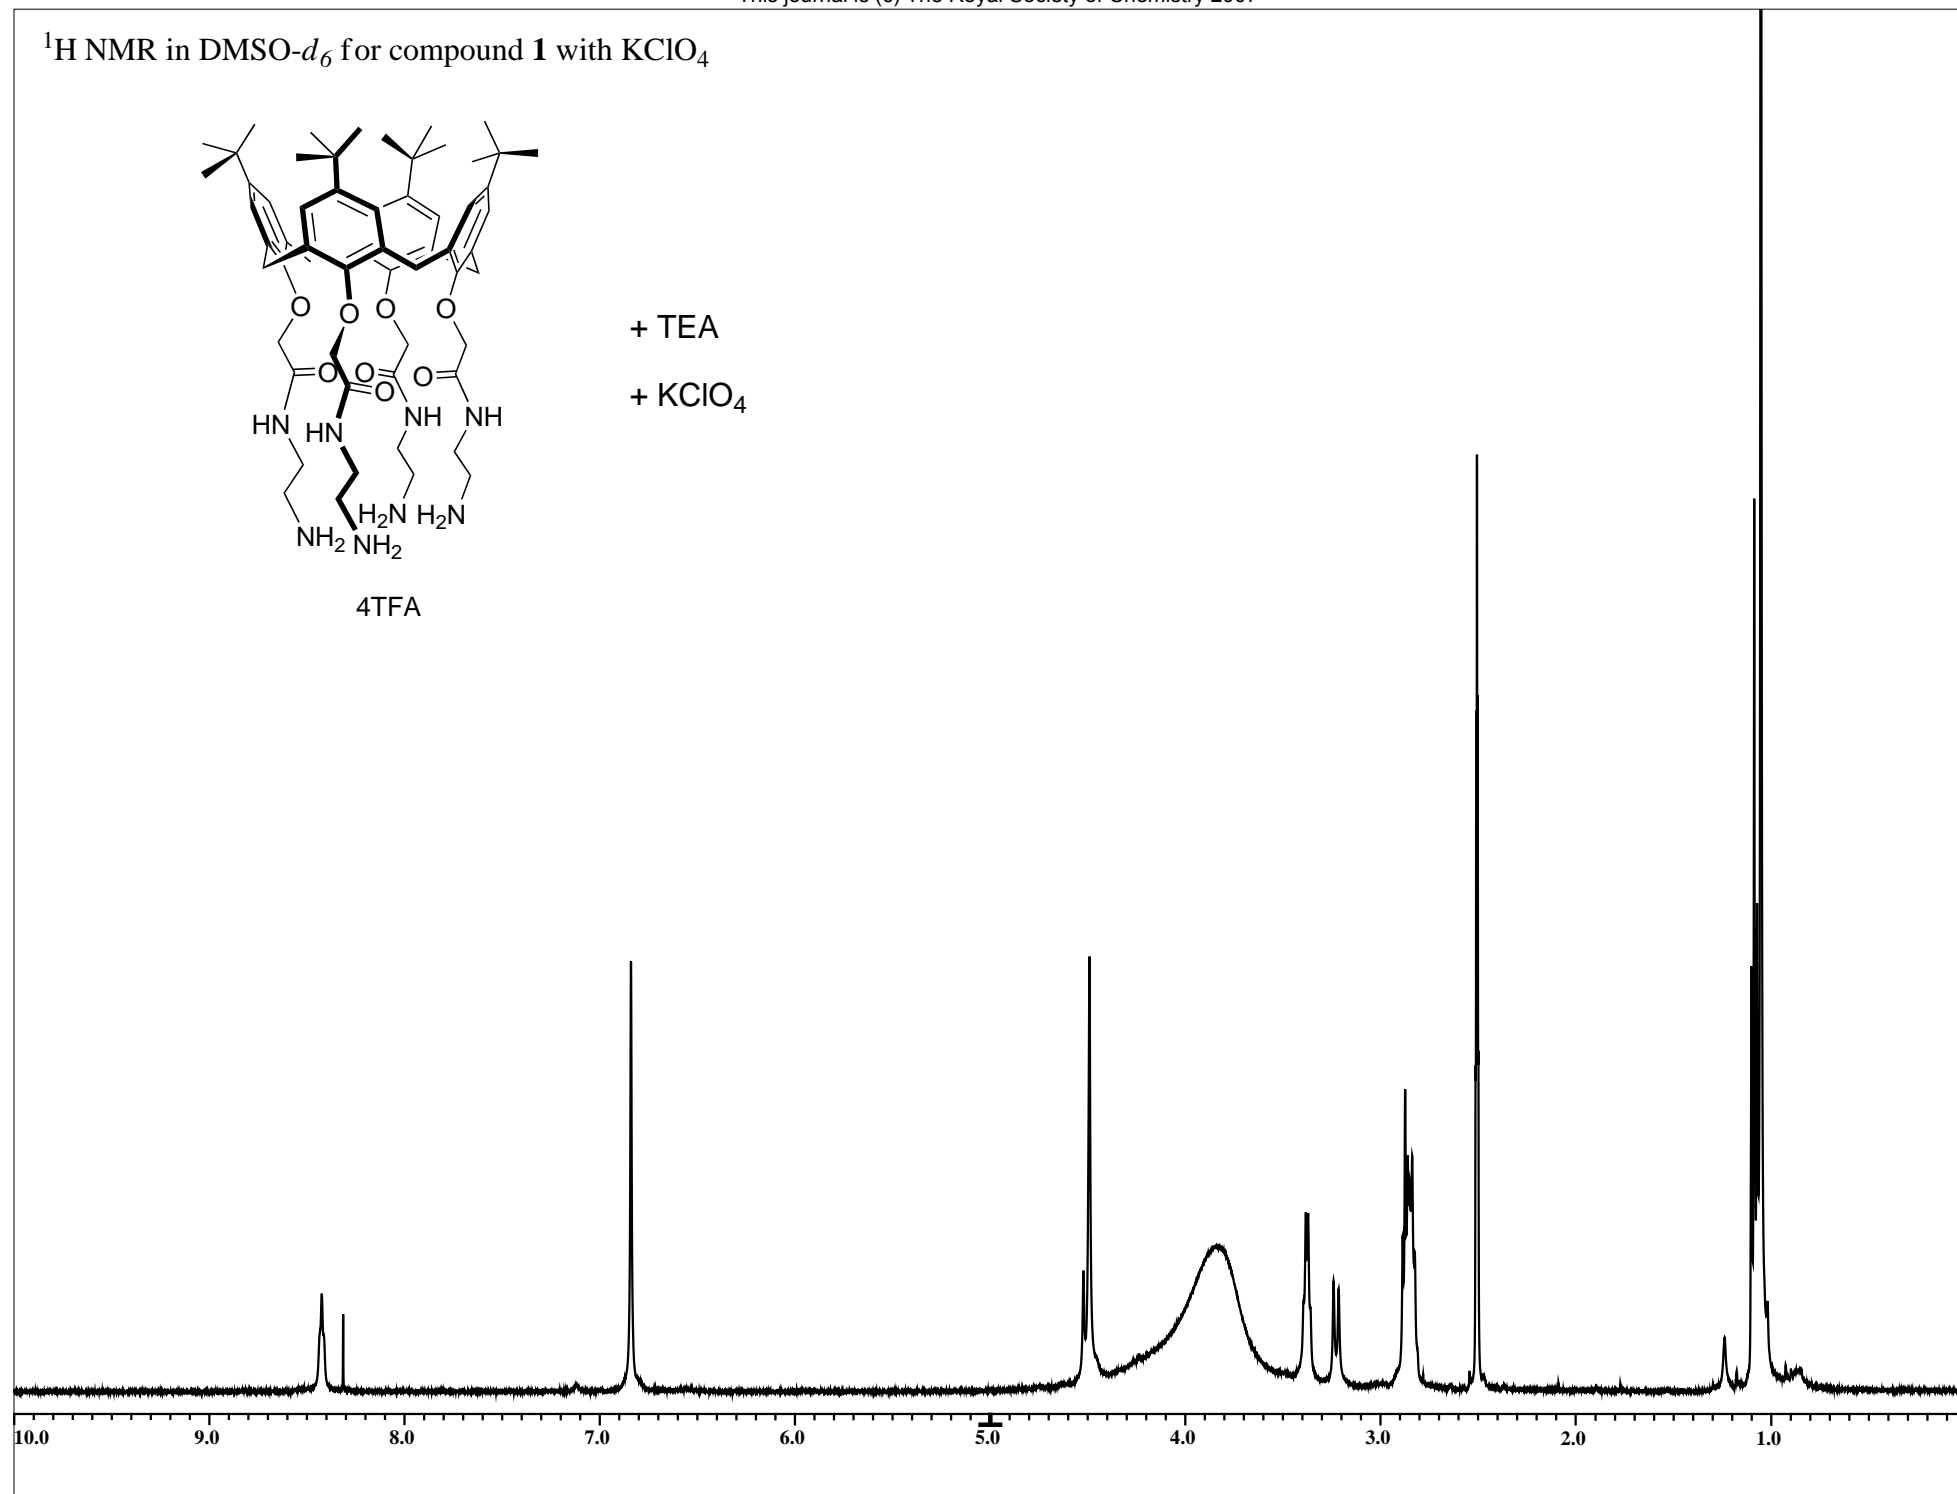

$^1\text{H}$  NMR in  $\text{DMSO-}d_6$  for compound **1** with  $\text{CsClO}_4$

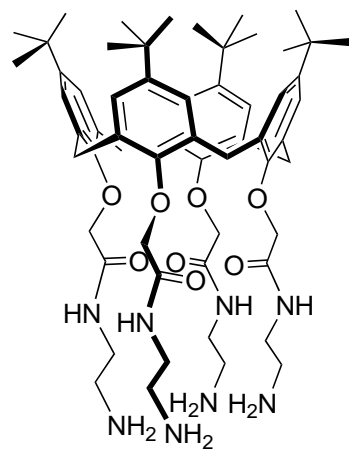

+ TEA

+  $\text{CsClO}_4$

4TFA

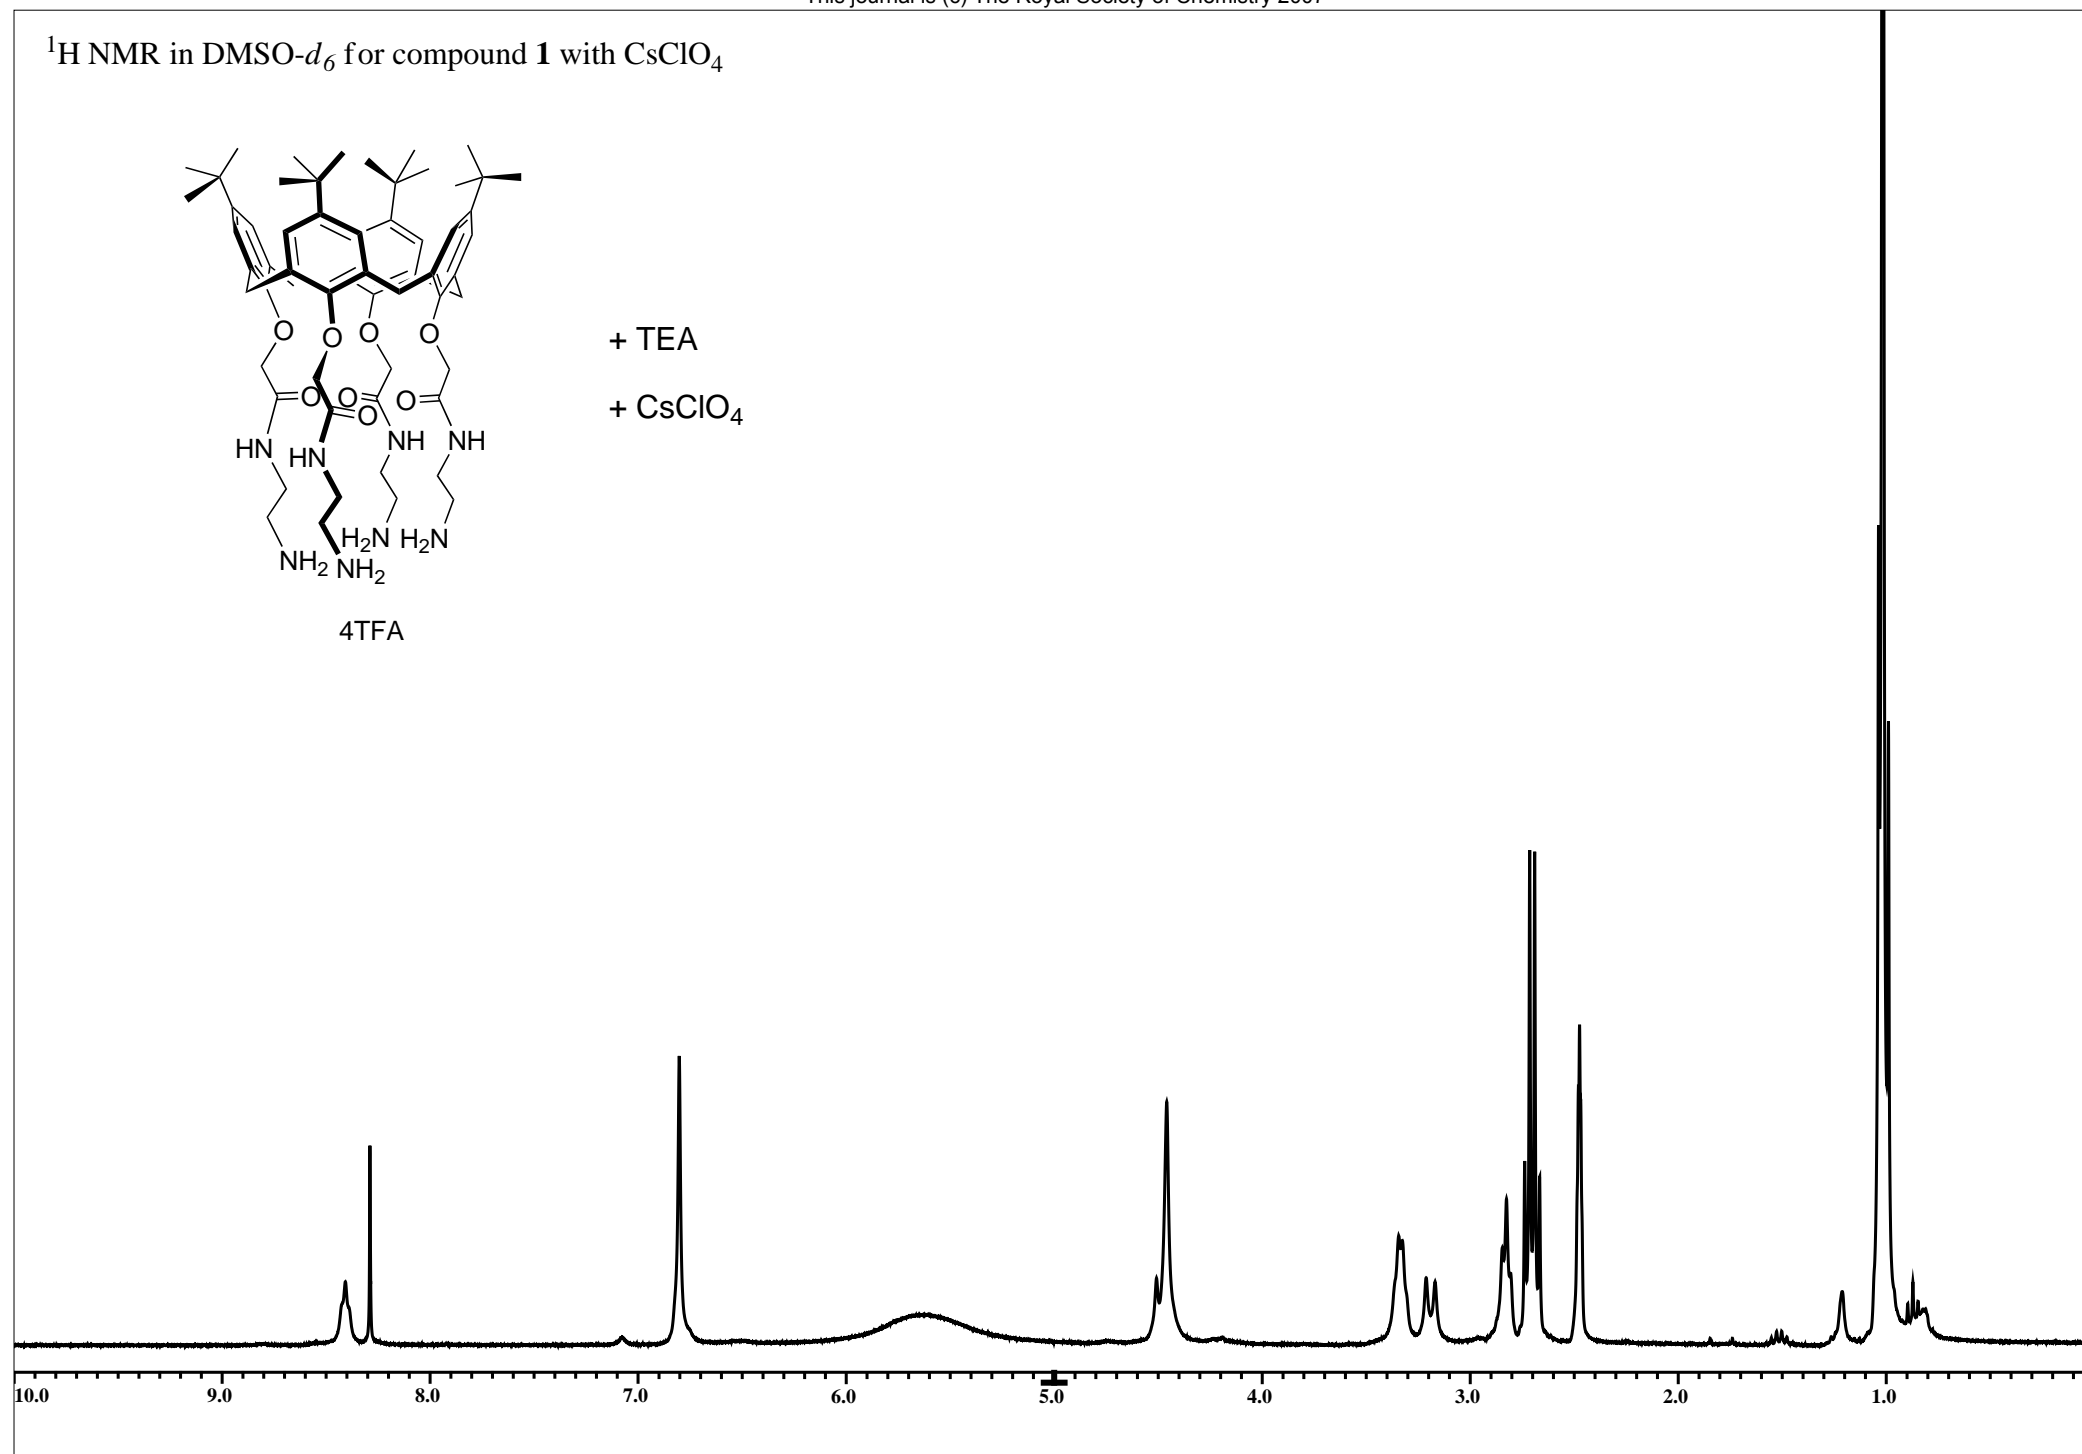

$^1\text{H}$  NMR in  $\text{CDCl}_3$  for solution after **2** was precipitated by  $\text{CO}_2$

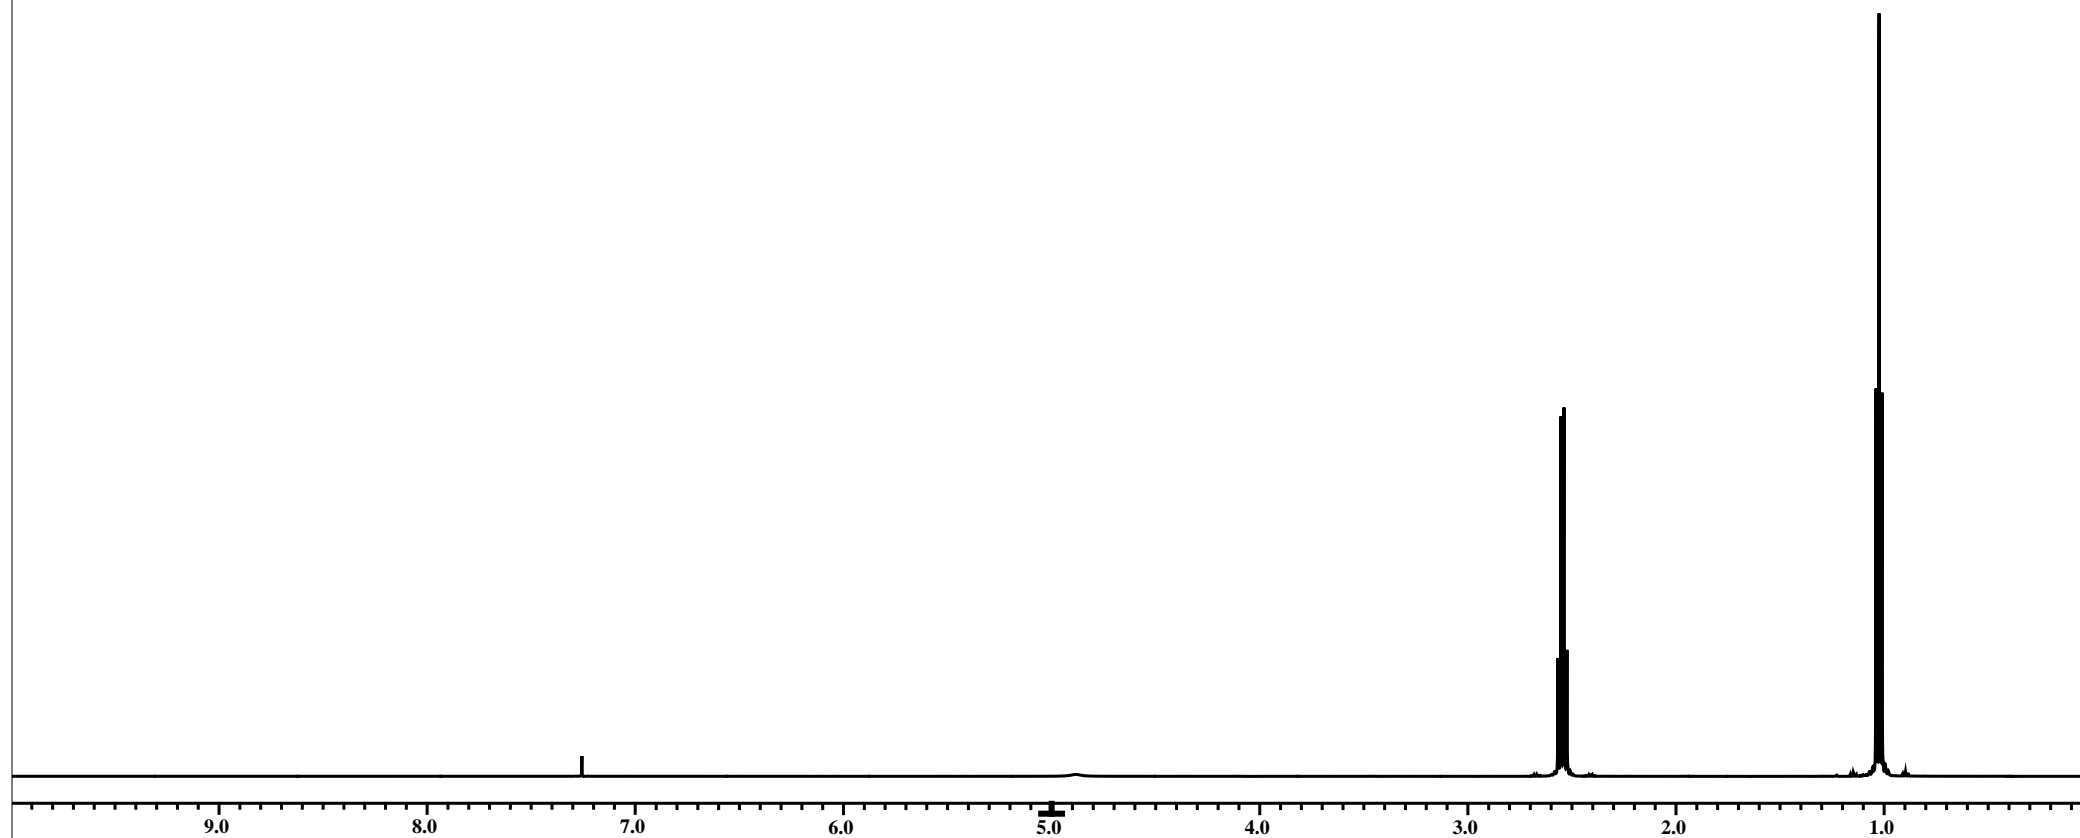

$^1\text{H}$  NMR in  $\text{CDCl}_3$  for compound **2**.  $\text{KClO}_4/\text{NaClO}_4 = 1000$

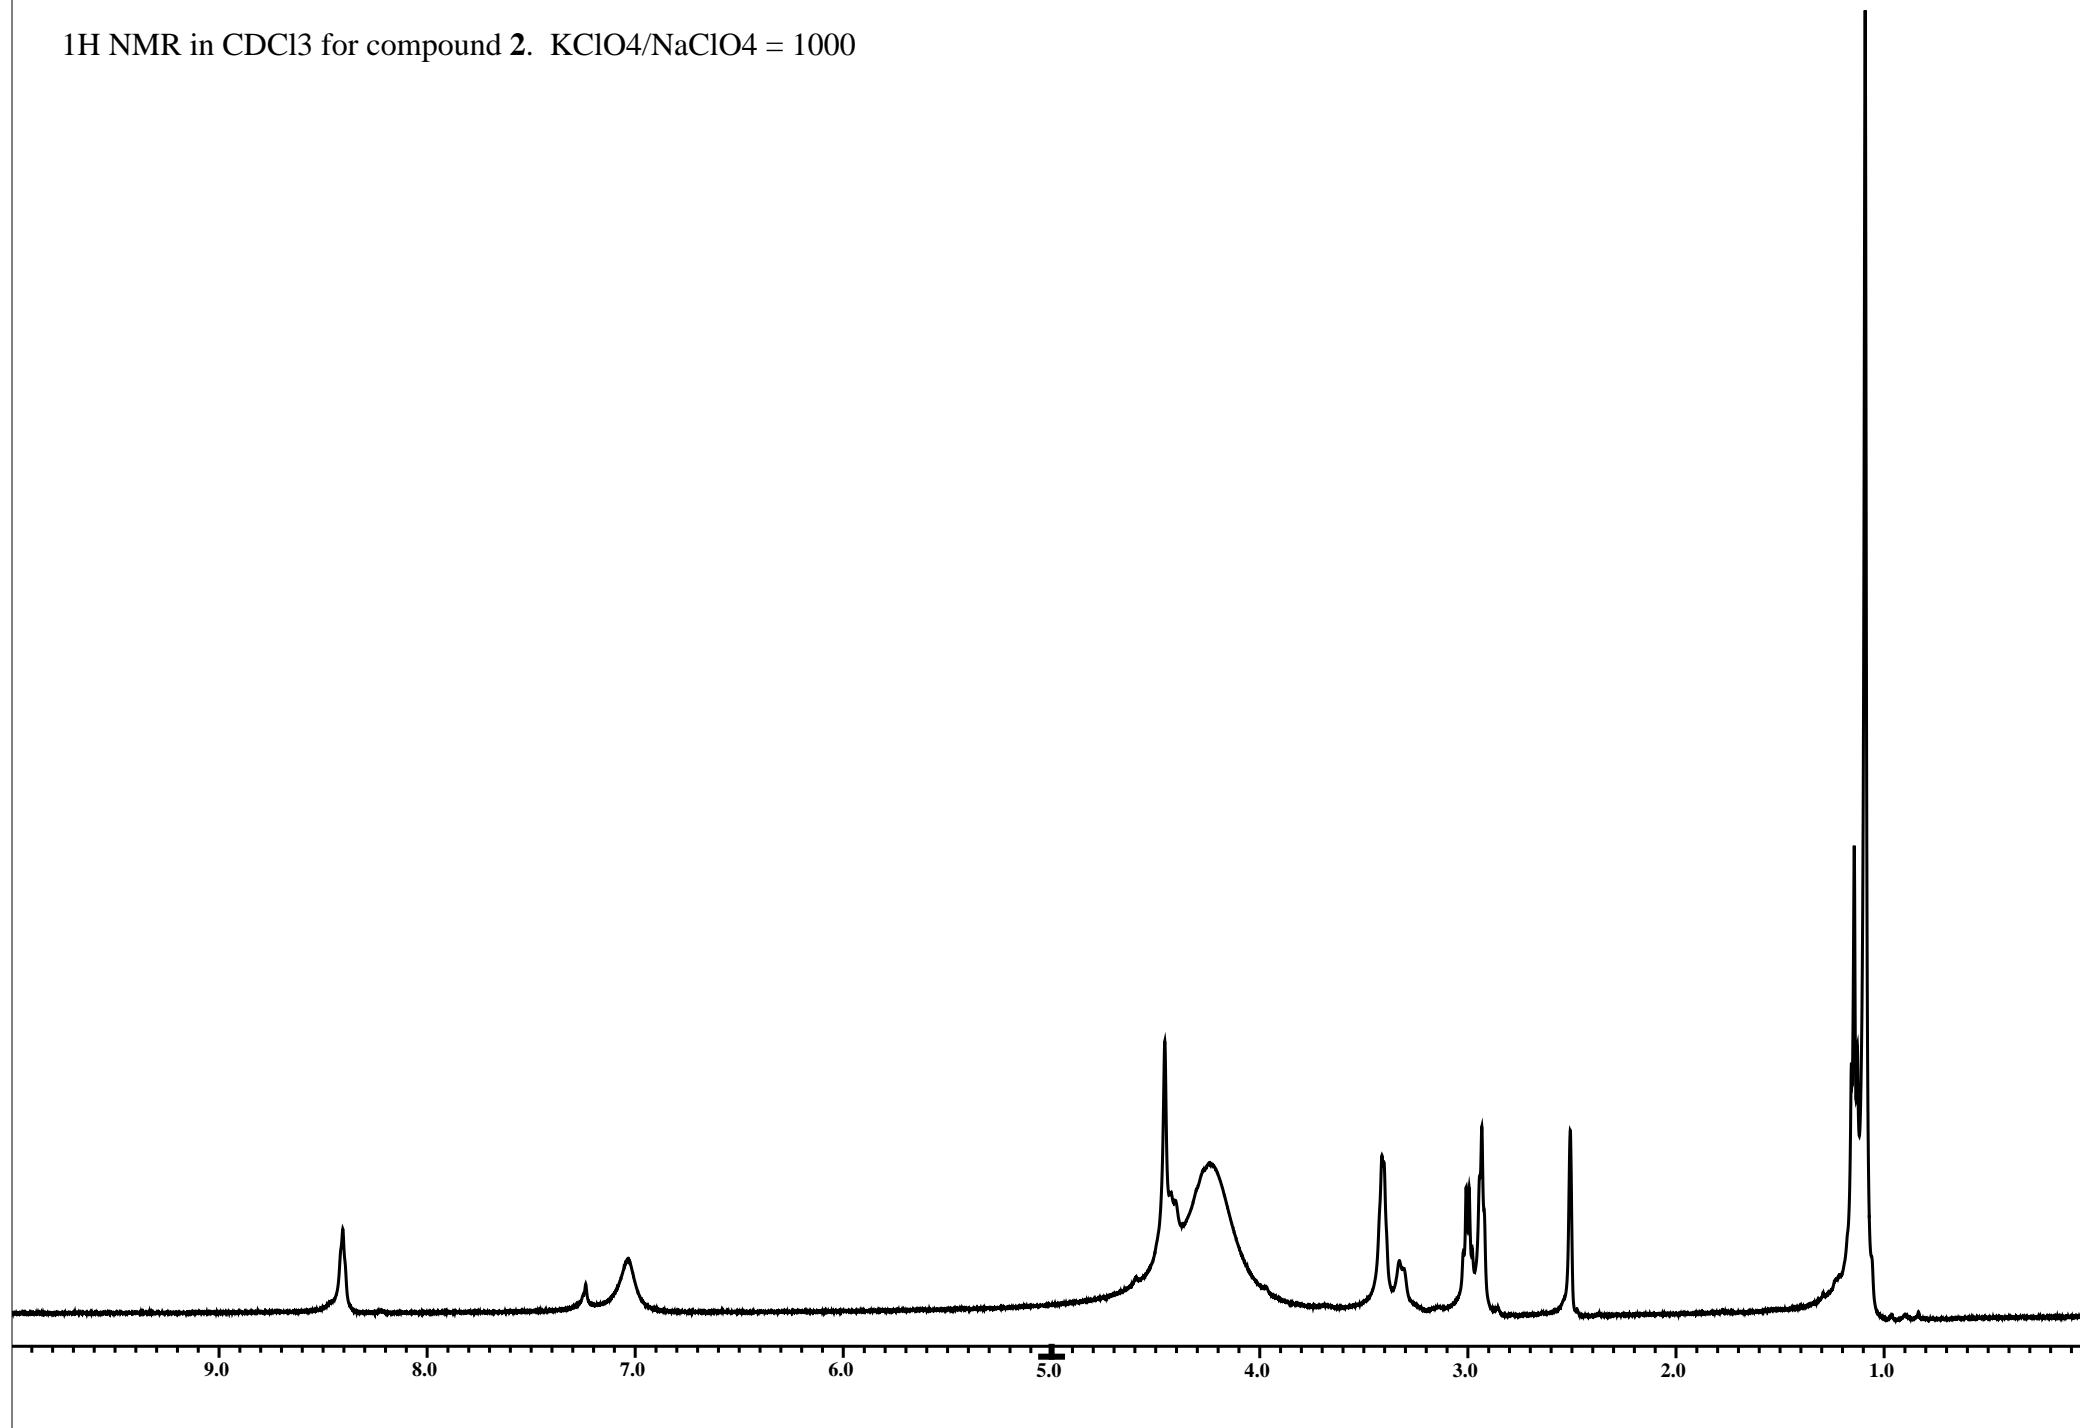

Supplement: b708420j.pdf [file b708420j.pdf]
